# Supplementary material for: Delta glutamate receptor conductance drives excitation of mouse dorsal raphe neurons
Source: eLife. 2020 Apr 1;9:e56054. doi: 10.7554/eLife.56054 (PMC7180053; doi:10.7554/eLife.56054)
Supplement: Figure 1—source data 1. [file elife-56054-fig1-data1.xlsx]

## Sheet: Figure 1
Figure 1B				Figure 1C	Figure 1D	Figure 1E		Figure 1G			Figure 1I											Figure 1J				Figure 1K			Figure 1L
ctrl	stim	stim+praz						ctrl	praz		time (min)	GDP-betaS			LiCl				1st EPSC	post dialysis		ctrl	ttx	wash		ctrl	res		ctrl	0[Ca2+]o
0	9	0		6.67093	3.96958	0.495752		-9.84449	-1.12428		0.196	-25.2886	11.369	10	-23.4986	3.64632	4		-26.2458	-1.21458		-32.8256	0.483178	-29.1186		-37.0679	-2.99534		-9.77454	0
0	23.25	0		3.61262	6.74241	0.752323		-10.5028	-0.35786		1.696	-14.7827	5.85064	9	-24.6858	4.0987	4		-9.79867	-1.51604		-20.2425	0.361005	-17.5568		-21.5892	-0.113041		-29.3289	-0.037136
0	23.5	0		6.61792	6.43258	0.0661012		-29.2787	-1.09029		3.196	-8.41986	2.76612	10	-31.3491	4.94961	4		-8.20913	-1.26002		-56.2047	-2.52439	-46.6119		-27.5247	-1.83431		-16.4684	-0.222413
0	5.75	0		10.184	5.20614	0.430555		-11.0717	-1.26928		4.696	-4.32705	1.72126	10	-35.773	7.96216	4		-11.5548	-1.71399		-55.2288	0.636799	-15.214		-12.3643	-1.55636		-6.82424	-0.548019
0	24.25	0		1.26404	3.96592	1.1288		-12.4378	0		6.196	-3.48326	0.941252	9	-36.8323	8.3423	4		-21.0645	-0.468444						-18.3897	-4.32132		-14.2277	-0.725646
0.5	44.75	0		6.8642	4.69742	0.5903		-30.7781	-1.49934		7.696	-3.22811	1.02191	7	-41.5466	8.84322	4		-19.2929	-1.54775						-23.5293	-1.01034		-16.0889	-2.30979
				27.6492	4.11541	1.09028		-11.8802	0.9698		9.196	-2.85725	1.23674	7	-33.2084	10.7196	4		-8.10846	-0.953087						-16.3037	-1.38392		-37.0996	0
								-17.8574	-1.17		10.696	-2.14049	0.893029	7	-34.3677	9.98954	4		-13.0277	-0.463056									-11.8441	-1.8243
								-11.2686	-1.71946										-9.48496	0									-24.4649	-4.75282
								-24.0846	-0.16147																				-4.33547	0
																													-14.8099	-4.30923
																													-11.4149	-3.72729
																													-22.3189	0
																													-13.0501	-0.274503
