# Supplementary material for: Delta glutamate receptor conductance drives excitation of mouse dorsal raphe neurons
Source: eLife. 2020 Apr 1;9:e56054. doi: 10.7554/eLife.56054 (PMC7180053; doi:10.7554/eLife.56054)
Supplement: Figure 2—source data 1. [file elife-56054-fig2-data1.xlsx]

## Sheet: Figure 2
Figure 2A			Figure 2C			Figure 2D			Figure 2E					Figure 2F					Figure 2G			Figure 2H								Figure 2I				Figure 2J				Figure 2K				Figure 2L
																							control			NMDG
basal	EPSC		basal	EPSC		EPSC	σ2		Vhold	basal	stim	EPSC		Vhold	mean	sem	n		EPSC	NA		time	mean	sem	n	mean	sem	n		2.5	6.5	10.5		2.5	6.5	10.5		ctrl	0[Ca2+]o	0[Mg2+]o		ctrl	0[Ca2+]o	0[Mg2+]o
570.539	492.39		5.62425	30.3787		-23.7947	24.7545		-120	-99.4873	-202.84	-103.353		-120	-42.1833	5.38227	31		-21.08	-22.83		0	-3.66077	1.77028	10	1.92138	3.10965	11		-88.8145	-77.8971	-59.7829		-21.08	-6.266	-9.991		-22.83	-41.49	-27.67		-34.2	-40.46	-23.8
495.05	398.84		7.61423	30.4619		-27.6213	22.8477		-118	-98.6364	-193.32	-94.6835		-118	-41.0801	4.89432	31		-22.7	-10.39		0.75	-1.26012	1.24751	10	2.28864	1.68843	11		-17.1152	-20.919	-18.455		-22.7	-22.81	-26.36		-10.39	-35.24	-6.236		-20.8	-50.55	-63.5
497.738	400.583		4.31019	45.272		-28.246	40.9618		-116	-97.9118	-187.26	-89.3478		-116	-39.5348	4.63106	31		-18.96	-20.43		1.5	-0.923965	0.697676	11	-0.464764	0.759487	12		-60.3464	-68.6262	-56.1877		-18.96	-4.792	1.117		-20.43	-22.91	-52.36		-43.3	-50.62	-48.8
462.185	346.566		5.36965	31.3331		-35.6297	25.9635		-114	-92.8262	-179.289	-86.4627		-114	-38.1245	4.17159	31		-25.66	-54.38		2.25	0.923965	0.697676	11	0.464764	0.759487	12		-22.6468	-24.4118	-18.6126		-25.66	-17.46	4.952		-54.38	-46.04	-21.05		-11.59	-30.91	-45.8
267.38	250.341		6.71587	24.5196		-16.5222	17.8038		-112	-91.1293	-174.664	-83.5342		-112	-38.0692	4.3862	31		-13.75	-29.26		3	-0.566178	1.50513	11	2.16465	1.14682	12		-32.8622	-67.6911	-65.1997		-13.75	-10.5	-21.47		-29.26	-38.14	-33.01		-40.03	-140.28	-27.5
182.421	192.982		9.75044	35.9555		-25.4196	26.205		-110	-86.886	-167.941	-81.0554		-110	-36.6979	4.37799	31		-27.69	-22.73		3.75	-2.39317	2.33475	11	-22.685	10.9412	12		-35.9749	-49.1871	-71.1318		-27.69	-1.962	-7.963		-22.73	-19.56	-37.54		-30.97	-20.75	-17.7
252.409	245.098		5.36135	57.791		-33.2464	52.4297		-108	-83.0685	-165.273	-82.2041		-108	-37.6781	4.23373	31		-27.55	-22.3		4.5	-5.56569	3.63244	11	-31.4	7.95551	11		-27.4933	-45.1761	-26.1294		-27.55	-31.3	-18.41		-22.3	-29.79	-38.41		-120.15	-70.2	-16.5
536.585	354.839		7.56916	16.2621		-11.7307	8.69295		-106	-79.2542	-154.179	-74.9245		-106	-37.9771	4.0325	31		-29.17	-30.27		5.25	-0.915465	5.30773	11	-29.5872	6.19214	11		-26.9732	-35.0726	-28.441		-29.17	-37.14	-7.252		-30.27	-22.43	-33.83		-40.82	-100.93	-56.8
150.933	137.089		28.1718	46.7896		-24.4779	18.6178		-104	-76.0665	-150.742	-74.6752		-104	-33.7669	3.65232	31		-31.07	-7.962		6	-2.59366	5.45602	11	-25.6888	6.20058	12		-17.572	-27.8407	-15.5399		-31.07	-25.74	-26.23		-7.962	-26.09	-57.14		-40.33	-50.68	-40.9
448.248	391.738		5.83532	30.5453		-19.6376	24.71		-102	-67.0395	-144.76	-77.7206		-102	-33.2553	3.76699	31		-30.41	-28.04		6.75	-2.93183	4.41226	10	-20.0966	5.73281	12		-15.2855	-10.9032	-15.2111		-30.41	-37.06	-24.85		-28.04	-7.707	-8.354		-11.4	-160.11	-19.5
495.05	429.017		2.57346	30.4653		-49.7054	27.8919		-100	-60.6902	-136.851	-76.1613		-100	-32.6577	3.68786	31		-28.11	-31.55		7.5	-5.62385	4.93642	10	-13.7275	7.69284	11		-31.1933	-29.1721	-57.1383		-28.11		-21.28		-31.55	-48.47	2.474		-14.6	-78.1	-58
596.529	556.117		20.6463	45.3422		-29.8277	24.6959		-98	-57.5333	-129.234	-71.701		-98	-32.9053	3.72362	31		-14.56	-24.57		8.25	-5.47074	5.88168	9	-7.22009	7.66721	11		-52.2701	-47.8791	-23.85		-14.56				-24.57	-25.35			-44.6	-30.78
630.011	500.455		6.79374	22.1966		-11.209	15.4029		-96	-54.0256	-128.561	-74.5349		-96	-31.8453	3.30758	31		-13.28	-24.1		9	-8.14709	9.10882	6	0.632393	9.04598	10		-34.67	-39.1204	-50.7329		-13.28				-24.1				-54.3	-128.8
181.339	177.878		9.72292	11.3257		-2.19722	1.60279		-94	-50.045	-124.993	-74.9481		-94	-30.6493	3.34226	31		-61.42	-21.89		9.75	-4.26779	8.10692	6	3.5307	8.0689	10		-9.83418	-12.938	-7.9051		-61.42				-21.89				-38.6	-141.6
827.068	678.175		15.713	26.6923		-10.1108	10.9793		-92	-44.809	-118.719	-73.9101		-92	-30.6169	3.60066	31		-24.21											-27.5	-14	-11.6		-24.21
130.394	123.263		24.7632	31.0448		-1.94885	6.28168		-90	-40.6623	-112.487	-71.8244		-90	-28.3354	3.37532	31		-37.14											-30.5	-34.2	-38.5		-37.14
248.195	242.933		5.35478	20.9675		-16.5674	15.6127		-88	-37.4565	-103.466	-66.0095		-88	-28.3159	3.2143	31		-44.98											-26.9	-25.6	-18.3		-44.98
489.76	385.154		62.563	89.7974		-18.0017	27.2344		-86	-34.7332	-97.5994	-62.8662		-86	-28.5709	3.20137	31		-41.75															-41.75
192.982	183.272		4.67532	46.0837		-47	41.4084		-84	-31.0142	-92.9668	-61.9526		-84	-26.3588	3.02915	31		-36.72															-36.72
376.971	402.341		3.16256	8.0497		-9.09946	4.88714		-82	-25.4059	-88.5239	-63.118		-82	-25.2461	3.0354	31		-40.24															-40.24
349.206	267.38		8.65442	86.9933		-63.7767	78.3389		-80	-21.965	-80.7915	-58.8264		-80	-25.1525	2.74658	31		-25.25															-25.25
303.365	286.011		11.1395	103.096		-51.4904	92.9537		-78	-18.8267	-74.4441	-55.6173		-78	-24.5322	2.68239	31		-10.01															-10.01
804.094	667.476								-76	-16.4566	-71.0411	-54.5845		-76	-23.8018	2.6092	31		-14.67															-14.67
546.177	484.582								-74	-13.5918	-65.9103	-52.3186		-74	-23.7267	2.45203	31		-21.97															-21.97
385.154	318.471								-72	-8.91188	-59.9156	-51.0037		-72	-22.9961	2.42309	31		-50.86															-50.86
526.82	439.648								-70	-5.378	-52.4979	-47.1199		-70	-22.6223	2.58295	31		-30.28															-30.28
239.651	204.309								-68	-2.11538	-50.4128	-48.2974		-68	-22.9686	2.56191	31
317.369	245.536								-66	2.92206	-46.5775	-49.4995		-66	-22.0634	2.39749	31
226.991	223.486								-64	3.96918	-43.9832	-47.9524		-64	-21.3493	2.51486	31
151.724	140.378								-62	9.11689	-37.742	-46.8589		-62	-21.0232	2.41729	31
402.341	385.154								-60	10.9675	-31.4972	-42.4646		-60	-20.3583	2.54999	31
									-58	14.8327	-27.3967	-42.2294		-58	-19.893	2.96033	31
									-56	19.2751	-18.5441	-37.8192		-56	-19.126	2.83579	31
									-54	23.273	-10.6451	-33.9181		-54	-18.2429	3.03097	31
									-52	26.8209	-6.67548	-33.4964		-52	-19.7384	3.37118	31
									-50	32.7505	4.0867	-28.6638		-50	-20.7287	3.91049	30
									-48	34.6687	5.95946	-28.7093		-48	-20.7391	4.00212	29
									-46	38.196	7.54651	-30.6494		-46	-19.9125	4.86263	30
									-44	36.3063	12.2838	-24.0225		-44	-14.1283	4.59923	28
									-42	39.9628	18.2419	-21.7209		-42	-15.8388	5.15561	25
									-40	38.8908	17.128	-21.7628		-40	-18.9018	4.91347	24
									-38	38.2751	19.8854	-18.3897		-38	-16.8752	6.45701	26
									-36	33.4964	23.0398	-10.4566		-36	-7.61719	5.83943	25
									-34	41.648	35.4194	-6.22862		-34	-14.5094	5.93636	27
									-32	49.0112	50.6249	1.61362		-32	-3.66185	5.23608	29
									-30	68.634	67.8368	-0.79727		-30	-7.52478	5.92034	29
									-28	91.2361	77.4078	-13.8283		-28	-10.3875	6.60398	30
									-26	95.6432	93.8918	-1.75144		-26	2.6726	6.78857	30
									-24	118.507	151.581	33.0734		-24	1.41908	6.90356	30
									-22	193.87	174.42	-22.0452		-22	5.20858	5.78155	31
									-20	211.032	211.136	0.103645		-20	4.19994	7.57331	31
									-18	250.999	261.962	10.9636		-18	6.5153	6.36426	31
									-16	290.325	314.255	23.9296		-16	9.03708	6.65512	31
									-14	343.566	377.557	33.9904		-14	7.99918	6.43157	31
									-12	418.095	427.762	9.66706		-12	13.1769	7.09289	31
									-10	457.012	509.781	52.7687		-10	14.0733	7.23672	31

## Sheet: Figure 2-figure supplement 1
Figure 2SC					Figure 2SD
Vhold	mean	sem	n		Vhold	mean	sem	n
-120	0.567743	0.084232	8		-120	-0.84998	0.153423	8
-110	0.542777	0.084879	8		-110	-0.9342	0.125252	8
-100	0.510094	0.087426	8		-100	-1.01183	0.148861	8
-90	0.517536	0.085653	8		-90	-1.13766	0.179399	8
-80	0.503474	0.090207	8		-80	-1.00226	0.178195	8
-70	0.518041	0.082234	8		-70	-0.95773	0.150577	8
-60	0.550191	0.083421	8		-60	-1.01164	0.189908	8
-50	0.50535	0.084588	8		-50	-0.9127	0.14847	8
-40	0.49013	0.087717	8		-40	-1.11777	0.238345	8
-30	0.462638	0.085315	8		-30	-0.9408	0.17814	8
-20	0.450617	0.087564	7		-20	-0.98328	0.139368	7
-10	0.385609	0.063096	8		-10	-0.97312	0.272142	8
0	0.316931	0.050783	8		0	-0.81677	0.291594	8
10	0.258865	0.047519	8		10	-0.74814	0.260746	8
20	0.268678	0.050521	8		20	-0.58073	0.190533	8
30	0.220069	0.047844	8		30	-0.35102	0.10184	8
