# Supplementary material for: Delta glutamate receptor conductance drives excitation of mouse dorsal raphe neurons
Source: eLife. 2020 Apr 1;9:e56054. doi: 10.7554/eLife.56054 (PMC7180053; doi:10.7554/eLife.56054)
Supplement: Figure 3—source data 1. [file elife-56054-fig3-data1.xlsx]

## Sheet: Figure 3
Figure 3B				Figure 3C			Figure 3D			Figure 3E								Figure 3F			Figure 3G								Figure 3H			Figure 3I
											Iwhole-cell			EPSC								NSP			NSP in NMDG								stim on			stim off
ctrl	NSP	wash		ctrl	NSP		basal	NSP		time	mean	sem	n	mean	sem	n		ctrl	NSP		Vhold	mean	sem	n	mean	sem	n		stimulated	unstimulated		time	mean	sem	n	mean	sem	n
-19.9956	-1.64779	-31.7594		5.82501	12.8197		7.61423	5.26455		0	2.49872	1.72336	16	109.656	5.08891	12		387.597	496.524		-120	41.4276	7.31977	8	6.65222	6.10896	11		6.99471	39.06		0	109.656	5.08891	12	97.9529	5.46615	5
-15.49	0	-12.6931		-27.5359	-6.9325		4.31019	1.36574		1.5	0.247192	1.47244	16	110.41	5.70785	12		1106.19	1101.32		-118	38.7044	7.00516	8	6.85781	6.11489	11		20.6034	14.34		1.5	110.41	5.70785	12	96.8017	5.91789	5
-33.6114	-0.43597	-19.1367		2.24297	45.6726		9.75044	2.80291		3	1.06191	1.09148	16	100.073	4.15418	12		417.362	600.962		-116	39.155	7.48667	8	6.40245	6.1118	11		43.4297	24.97		3	100.073	4.15418	12	98.7541	4.56187	5
-10.8551	0	-5.77341		-15.5899	12.0347		5.36135	1.97226		4.5	-0.34461	0.733914	16	99.3549	1.94389	12		435.92	515.464		-114	38.5247	7.21884	8	5.88842	6.05976	11		27.6246	8.85		4.5	99.3549	1.94389	12	101.732	1.60335	5
-23.5195	-0.14288	-21.4553		6.22085	21.1883		7.56916	2.7332		6	0.348381	0.577651	16	100.572	4.61674	12		484.966	586.855		-112	36.8457	7.26058	8	5.87741	5.44822	11		14.9674	22.58		6	100.572	4.61674	12	99.5138	3.0809	5
-24.5465	-0.92451	-19.1292		-13.1811	7.18764		5.83532	3.51622		7.5	3.45293	1.3309	16	57.285	8.09907	12		956.023	1228.5		-110	33.5039	6.704	8	5.25364	4.92413	11		20.3687			7.5	57.285	8.09907	12
-11.2656	-2.93988	-19.9655		6.94798	25.342		2.57346	1.4093		9	12.1766	3.01692	16	13.0513	3.88269	12		440.529	543.478		-108	33.0988	6.1981	8	4.40239	4.92874	11		18.394			9	13.0513	3.88269	12
-19.9315	-0.17734	-1.15252		-5.40794	10.9352		20.6463	8.28467		10.5	15.7687	2.83482	16	3.80537	1.68381	12		285.388	511.771		-106	33.802	6.72814	8	4.51417	4.68917	11		16.3431			10.5	3.80537	1.68381	12
				14.9969	41.4989		6.79374	4.36451		12	17.8013	3.17294	16	4.26971	2.40578	12		567.537	910.747		-104	31.1824	6.11628	8	3.93816	4.71738	11		26.502			12	4.26971	2.40578	12	8.12963	1.03146	2
				-14.264	12.0935		9.72292	6.70209		13.5	17.1426	3.58548	15	3.95392	3.13743	11		459.559	602.41		-102	31.7655	5.90455	8	3.74499	4.32146	11		26.3575			13.5	3.95392	3.13743	11	6.37071	3.81534	5
				64.5446	105.477		15.713	12.6764		15	15.2015	4.19302	14	5.29591	2.07992	10					-100	30.8431	5.68012	8	3.09725	4.351	11		40.9322			15	5.29591	2.07992	10	8.76992	5.72466	3
				-1.46089	16.4982		24.7632	17.8278		16.5	13.5819	5.09056	12	11.4462	5.1198	10					-98	30.8185	5.67857	8	3.03442	4.17386	11		17.9591			16.5	11.4462	5.1198	10	7.77973	6.51687	5
				57.2327	47.1486		5.35478	3.06397		18	11.0014	5.28283	12	15.5343	5.71468	10					-96	30.2593	5.64305	8	3.21787	3.90699	11		-10.0841			18	15.5343	5.71468	10	6.84044	1.71543	3
				73.0103	99.5174		4.67532	3.66003		19.5	10.236	5.71496	12	21.5741	8.06874	9					-94	29.5229	5.32326	8	2.97904	3.89369	11		26.5071			19.5	21.5741	8.06874	9	9.79481	4.66804	5
				59.0335	69.1503		3.16256	3.05484		21	9.53298	5.20085	8	36.7165	10.3756	8					-92	28.6265	5.04208	8	2.8675	3.86969	11		10.1168			21	36.7165	10.3756	8	16.746	2.10378	3
				52.3477	58.4599		8.65442	7.59416		22.5	8.78062	6.03321	8	39.8584	12.872	8					-90	28.1752	5.22967	8	2.56237	3.68811	11		24.9089			22.5	39.8584	12.872	8	22.0871	3.97779	3
				-10.502	14.4068		11.1395	5.09676		24	8.21707	6.61302	8	47.6523	9.5619	9					-88	27.4711	5.42848	8	2.30373	3.6774	11		22.8074			24	47.6523	9.5619	9	29.0649	7.36314	3
				-57.6278	-34.8204		25.0823	7.60634		25.5	11.1458	6.62835	8	48.1071	10.5345	9					-86	25.2907	4.94972	8	2.1626	3.61056	11		40.4207			25.5	48.1071	10.5345	9	32.0827	9.86577	4
				-29.0224	11.3983		13.3466	7.64025		27	8.41182	6.92758	7	48.1056	13.0205	8					-84	25.6186	4.67213	8	1.64323	3.5014	11		25.3686			27	48.1056	13.0205	8	36.3826	6.15973	3
				24.4363	49.805					28.5	6.92318	6.49325	7	56.5512	17.8857	8					-82	25.1093	4.57815	8	1.23596	3.39384	11		18.2803			28.5	56.5512	17.8857	8	33.4218	13.2801	4
				21.3359	39.6162					30	5.54718	6.83411	7	61.0241	12.6104	8					-80	24.7512	4.71929	8	0.773343	3.37295	11		6.11225			30	61.0241	12.6104	8	49.9417	6.38158	3
										31.5	6.44008	5.72104	7	56.4051	13.3222	8					-78	22.5378	4.3468	8	1.06007	3.50171	11
										33	8.98219	5.11133	6	64.4466	15.5311	8					-76	23.325	4.26458	8	1.40762	3.49315	11
										34.5	9.1127	5.1534	6	68.7086	15.9471	8					-74	22.1853	4.29471	8	0.295466	3.6517	11
										36	7.16673	5.81283	6	74.3158	17.7577	8					-72	22.3981	4.16428	8	0.132759	4.1037	11
										37.5	6.34687	5.23533	5	71.9788	22.9251	7					-70	23.5393	4.65132	8	0.587319	4.23177	11
										39	5.64293	7.36912	4	75.6152	16.4917	7					-68	21.8836	5.2044	8	-0.33361	4.98625	11
																					-66	20.1154	5.02406	8	-1.17319	5.11571	11
																					-64	19.5412	5.08616	8	-0.86573	5.14364	11
																					-62	21.1963	4.47109	8	-0.99317	5.40456	11
																					-60	21.0284	4.93086	8	-0.54664	5.68159	11
																					-58	9.50714	10.344	8	-0.3214	6.10304	11
																					-56	27.8616	4.39865	8	-1.57143	6.40755	11
																					-54	24.8237	7.89442	8	-1.89068	6.70192	11
																					-52	24.4025	7.93772	8	-2.96905	7.995	11
																					-50	27.3925	5.54483	8	-1.81934	7.91613	11
																					-48	18.8158	12.7902	8	-2.23152	9.23732	11
																					-46	25.6439	8.07846	8	-0.8323	8.50477	11
																					-44	13.6589	7.78346	8	0.046413	9.73452	11
																					-42	23.614	15.7908	8	-1.95278	11.8465	11
																					-40	25.5086	15.4072	8	-5.7054	14.0359	11
																					-38	7.60432	13.5785	8	-5.23594	15.9339	11
																					-36	2.57259	13.6743	8	-10.9438	16.5531	11
																					-34	4.38567	14.7323	8	-6.30375	19.4472	11
																					-32	0.02312	14.0628	8	-18.0397	21.1694	11
																					-30	-5.71401	15.3144	8	-16.3227	24.3293	11
																					-28	-18.4291	18.3833	8	-21.3703	27.7387	11
																					-26	-24.6578	19.3772	8	-26.2279	27.6763	11
																					-24	-34.266	19.6863	8	-30.2679	30.3769	11
																					-22	-38.352	24.264	8	-35.2301	30.3869	11
																					-20	-52.2129	22.7268	8	-50.7778	33.7146	11
																					-18	-61.4536	27.5181	8	-58.0737	38.7133	11
																					-16	-72.7515	28.8516	8	-70.7574	37.679	11
																					-14	-85.0634	27.9131	8	-65.5584	39.3884	11
																					-12	-88.1394	32.8435	8	-78.8904	39.047	11
																					-10	-99.9198	35.6301	8	-87.6038	41.5667	11
