# Supplementary material for: Delta glutamate receptor conductance drives excitation of mouse dorsal raphe neurons
Source: eLife. 2020 Apr 1;9:e56054. doi: 10.7554/eLife.56054 (PMC7180053; doi:10.7554/eLife.56054)
Supplement: Figure 4—source data 1. [file elife-56054-fig4-data1.xlsx]

## Sheet: Figure 4
Figure 4A				Figure 4B					Figure 4C				Figure 4D					Figure 4E
				ctrl		d-serine							ctrl		glycine			NSP			D-S			glyc			KA
ctrl	D-S	wash		epsc	σ2	epsc	σ2		ctrl	glycine	wash		epsc	σ2	epsc	σ2		mean	sem	n	mean	sem	n	mean	sem	n	mean	sem	n
-26.8419	-17.0782	-32.424		-22.8166	11.5607	-5.31457	1.12835		-54.0226	-8.61842	-45.3282		-10.958	6.96118	-0.9364	-1.16004		4.0024	2.12499	12	50.2689	9.57256	10	29.1494	10.9577	7	34.3803	8.27692	7
-21.7622	-12.8571	-13.0972		-28.079	49.6093	-17.455	17.7339		-11.135	-0.50907	-42.7931		-7.2771	9.58931	-1.585	-0.0336797
-12.7334	-7.75652	-14.1304		-23.126	30.8729	-14.468	17.845		-7.37504	-0.934592	-19.7963		-24.668	33.8156	-5.6824	2.71278
-73.202	-61.3183	-93.6218		-12.808	12.2816	-8.6798	6.08081		-22.3224	-8.31898	-7.76256		-42.474	33.7868	-19.028	12.0507
-40.2328	-16.1778	-44.4696		-70.3	68.4192	-38.769	52.6968		-25.9126	-4.91168	-24.7102		-22.804	19.385	-21.323	18.3413
-26.8724	-1.87531	-19.1483		-42.439	45.6493	-17.024	6.82672		-46.7299	-11.1537	-21.7113
-13.8418	-6.1889	-20.2081		-22.031	9.44755	-6.8202	-1.26057		-19.3814	-17.5901	-31.413
				-43.646	31.875	-13.02	12.0462
				-15.464	10.9113	-3.7791	4.94752
				-10.109	9.28057	-12.386	8.27017
