# Supplementary material for: Delta glutamate receptor conductance drives excitation of mouse dorsal raphe neurons
Source: eLife. 2020 Apr 1;9:e56054. doi: 10.7554/eLife.56054 (PMC7180053; doi:10.7554/eLife.56054)
Supplement: Figure 5—source data 1. [file elife-56054-fig5-data1.xlsx]

## Sheet: Figure 5
Figure 5A					Figure 5B				Figure 5C								Figure 5D				Figure 5E
ctrl		Grid1								ctrl			Grid1
basal	EPSC	basal	EPSC		ctrl	Grid1	non		Vhold	mean	sem	n	mean	sem	n		ctrl	Grid1	non		ctrl	Grid1
373.895	366.422	175.663	179.504		-12.8	-0.26064	-9.44		-120	-28.1492	4.27514	13	-6.67318	3.57103	16		-33.6	-43.9	-185.5		23.2	4.3
229.262	200.73	609.081	617.284		-23.2107	0	-19.8947		-118	-30.804	4.16807	13	-6.57002	3.63251	16		-78.7	-3.1	-56.2		12.2	9.8
433.071	397.112	293.49	307.606		-18.6668	0	-9.66575		-116	-30.7996	4.55727	13	-5.9316	3.31624	16		-23.8	2.4	-37.2		59.2	29.3
107.653	100.347	617.284	638.792		-19.651	-0.308	-33		-114	-31.225	4.54684	13	-5.91388	3.19658	16		-124.5	-12.2	-79.3		12.8	1.2
286.907	267.38	757.576	770.308		-41.1206	-3.69	-14		-112	-29.3007	3.71466	13	-5.86039	2.97705	16		-18.9	-22.6			33.6	20.1
653.207	570.539	617.284	613.155		-6.91447	0	-16.5		-110	-28.9236	4.35786	13	-5.80858	3.31285	16		-22	-23.3				5.5
390.071	331.325	466.893	476.603		-45.0976	0	-17.1		-108	-30.7503	3.85881	13	-5.08652	2.76093	16		-28.1	36.6				6.7
648.585	539.745	448.248	459.866		-11.2346	0			-106	-28.5028	5.12605	13	-5.65974	2.55172	16		-40.9	18.3				7.9
328.947	289.779	459.866	439.648		-22.8706	0			-104	-27.3436	2.65616	13	-6.14016	2.7195	16		-90.9	-36.6				-13.4
174.271	156.161	341.403	317.369		-16.8169	-18.228			-102	-25.454	3.85975	13	-5.68034	2.43992	16		-34.8	-8.5				1.8
648.585	489.76	570.539	549.451		-28.6457	0.487118			-100	-22.4946	3.06944	13	-5.6026	2.3326	16		-81.8	-4.9				-20.1
487.157	425.039	297.458	298.426		-19.5	-4.9			-98	-23.1083	3.41148	13	-4.77778	1.96221	16		-40.3	-86.1
517.891	443.906	407.709	391.738		-22.6	-7.3			-96	-25.0931	3.42847	13	-5.12872	1.81492	16		-47	-33
		342.679	315.006		-9.8	-8.5			-94	-25.1034	3.57478	12	-5.50454	2.20948	16		-40.3	-36.6
		198.055	207.156		-7.3	-1.8			-92	-24.0718	2.6211	12	-4.65326	1.85678	16		-39.7	-43.9
		489.76	469.283			0			-90	-21.7247	3.11804	12	-4.87043	1.9224	16		-28.7	16.5
									-88	-20.8747	2.35332	12	-4.81186	1.98513	16
									-86	-21.2424	2.50278	13	-4.02225	1.9805	16
									-84	-19.0626	2.74626	13	-4.484	1.7206	16
									-82	-19.6803	2.57307	13	-3.61379	1.81478	16
									-80	-18.2029	2.66514	13	-3.90701	1.81806	16
									-78	-16.2047	2.2363	13	-3.66738	1.68241	16
									-76	-16.52	1.75384	13	-2.7415	1.34369	16
									-74	-16.2888	2.16829	13	-2.73565	1.41065	16
									-72	-15.838	1.85968	13	-3.7355	1.77376	16
									-70	-16.3891	2.10706	13	-2.23105	1.43459	16
									-68	-14.8004	2.13182	13	-3.24889	1.57681	16
									-66	-17.1397	1.7718	13	-2.83076	1.63481	16
									-64	-13.0903	1.93255	13	-2.78234	1.5721	16
									-62	-13.7174	2.12197	13	-1.8459	1.61015	16
									-60	-13.699	2.56104	13	-3.03066	1.51936	16
									-58	-14.2336	2.36378	13	-2.18652	1.59847	16
									-56	-12.4464	2.35721	13	-1.7979	2.05348	16
									-54	-12.1006	2.68916	13	-1.62811	2.0044	16
									-52	-10.3878	2.74467	13	-1.79292	1.77423	16
									-50	-10.4964	4.4401	13	0.851459	1.97329	16
									-48	-14.1241	4.23642	13	2.84741	2.57067	16
									-46	-7.27851	3.49749	13	-2.77355	3.95721	16
									-44	-5.50453	4.9969	13	-1.31487	3.76186	16
									-42	2.55146	7.54153	13	2.21592	3.75088	16
									-40	-10.8988	7.93902	13	3.73931	3.7424	16
									-38	-2.12513	6.48187	13	4.07944	3.35427	16
									-36	-4.87513	9.02581	13	6.84089	4.98637	16
									-34	8.85658	10.3977	13	8.81742	4.5442	16
									-32	1.93013	6.63137	13	8.33405	5.49448	16
									-30	-4.75816	8.31856	13	1.44526	6.54515	16
									-28	13.0525	6.25831	13	7.03201	6.53346	16
									-26	15.189	8.21232	13	9.82527	6.91046	16
									-24	32.3968	14.2102	13	10.365	7.79747	16
									-22	27.3138	11.6223	13	16.2434	6.92789	16
									-20	25.8935	11.134	13	12.1405	8.37762	16
									-18	15.4154	14.2631	13	13.2837	8.3312	16
									-16	16.4716	14.7272	13	14.9874	9.42043	16
									-14	27.8242	14.4154	13	21.07	9.6521	16
									-12	36.0463	15.0642	13	22.3664	12.1451	16
									-10	27.0656	18.2081	13	21.2001	11.6268	16
