# Supplementary material for: Delta glutamate receptor conductance drives excitation of mouse dorsal raphe neurons
Source: eLife. 2020 Apr 1;9:e56054. doi: 10.7554/eLife.56054 (PMC7180053; doi:10.7554/eLife.56054)
Supplement: Figure 6—source data 1. [file elife-56054-fig6-data1.xlsx]

## Sheet: Figure 6
Figure 6B			Figure 6C			Figure 6D			Figure 6E								Figure 6F			Figure 6G			Figure 6H			Figure 6I
										ctrl			Grid1
ctrl	Grid1		ctrl	Grid1		ctrl	Grid1		time	mean	sem	n	mean	sem	n		ctrl	Grid1		ctrl	Grid1		ctrl	Grid1		ctrl	Grid1
6108	6938		16.8168	19.6197		0.44	0.261905		2.068	0.0201	0.010234	10	0.0067	0.0067	10		9.09	14.4		31.959	20.368		30.84	39.37		18.615	25.735
5713	2631		24.0685	20.1535		0.36	0.4		2.135	0.0402	0.020469	10	0.0134	0.0134	10		4.35	6.78		18.425	19.497		31.16	28		26.92	37.445
7211	5195		32.3212	16.2385		0.42	0.511628		2.202	0.0603	0.030703	10	0.0201	0.0201	10		9.02	12.27		12.395	27.604		38.66	23.02		20.82	20.96
5791	6171		11.1445	11.8563		0.5	0.466667		2.268	0.0804	0.040938	10	0.0268	0.0268	10		0	13.1		8.576	9.179		26.89	8.44		13.91	13.725
6575	5276		21.3102	9.69859		0.5	0.309524		2.335	0.1005	0.051172	10	0.0335	0.0335	10		7.56	5.33		14.472	11.658		26.89	14.01		14.9	21.72
5532	6354		31.4982	3.24769		0.56	0.230769		2.402	0.1206	0.061407	10	0.0402	0.0402	10		6.59	8.27		8.978	21.038		45.63	5.31		20.145	19.88
4319	5129		23.8906	7.51863		0.5	0.26087		2.469	0.1407	0.071641	10	0.0469	0.0469	10		4.6	7.33		15.544	8.241		28.52	17.43		30.205	14.115
7117	8174		7.07374	3.6036		0.28	0.216216		2.535	0.1608	0.081875	10	0.0536	0.0536	10		9.69	6.18		17.487	13.802		13.1	13.94		16.895	22.91
6893	1734		20.4427	10.7663		0.44	0.333333		2.602	0.1809	0.09211	10	0.0603	0.0603	10		2.78	5.08		16.013	12.931		25.34	24.02		14.1	33.385
5567	2413		33.4557	14.3477		0.57	0.447368		2.669	0.201	0.102344	10	0.067	0.067	10		8.98	4.25		16.951			30.95	24.02		16.725	35.96
1598	3260								2.736	0.2211	0.112579	10	0.0737	0.0737	10
2059	2167								2.802	0.2412	0.122813	10	0.0804	0.0804	10
1838	4062								2.869	0.2613	0.133047	10	0.0871	0.0871	10
3894	5363								2.936	0.2814	0.143282	10	0.0938	0.0938	10
1755	5689								3.003	0.3015	0.153516	10	0.1005	0.1005	10
3187									3.069	0.3216	0.163751	10	0.1072	0.1072	10
4935									3.136	0.3417	0.173985	10	0.1139	0.1139	10
6690									3.203	0.3618	0.18422	10	0.1206	0.1206	10
									3.269	0.3819	0.194454	10	0.1273	0.1273	10
									3.336	0.402	0.204688	10	0.134	0.134	10
									3.403	0.4221	0.214923	10	0.1407	0.1407	10
									3.47	0.4422	0.225157	10	0.1474	0.1474	10
									3.536	0.4623	0.235392	10	0.1541	0.1541	10
									3.603	0.4824	0.245626	10	0.1608	0.1608	10
									3.67	0.5025	0.25586	10	0.1675	0.1675	10
									3.737	0.5226	0.266095	10	0.1742	0.1742	10
									3.803	0.5427	0.276329	10	0.1809	0.1809	10
									3.87	0.5628	0.286564	10	0.1876	0.1876	10
									3.937	0.5829	0.296798	10	0.1943	0.1943	10
									4.004	0.603	0.307033	10	0.2077	0.200366	10
									4.07	0.6231	0.317267	10	0.2211	0.206641	10
									4.137	0.6432	0.327501	10	0.2345	0.213105	10
									4.204	0.6633	0.337736	10	0.2479	0.219742	10
									4.27	0.6834	0.34797	10	0.2613	0.226538	10
									4.337	0.7035	0.358205	10	0.2747	0.233477	10
									4.404	0.7236	0.368439	10	0.2881	0.240548	10
									4.471	0.7437	0.378674	10	0.3015	0.247739	10
									4.537	0.7638	0.388908	10	0.3149	0.25504	10
									4.604	0.7839	0.399142	10	0.3283	0.262443	10
									4.671	0.804	0.409377	10	0.3417	0.269938	10
									4.738	0.8241	0.419611	10	0.3618	0.276645	10
									4.804	0.8442	0.429846	10	0.3819	0.283563	10
									4.871	0.8643	0.44008	10	0.402	0.290677	10
									4.938	0.8844	0.450314	10	0.4221	0.297972	10
									5.005	0.9045	0.460549	10	0.4355	0.303971	10
									5.071	0.9246	0.470783	10	0.4489	0.310112	10
									5.138	0.9447	0.481018	10	0.4623	0.316385	10
									5.205	0.9581	0.487875	10	0.4757	0.322784	10
									5.271	0.9715	0.494798	10	0.4891	0.329301	10
									5.338	0.9849	0.501785	10	0.5025	0.335929	10
									5.405	0.9983	0.508833	10	0.5159	0.342662	10
									5.472	1.0117	0.515939	10	0.5293	0.349493	10
									5.538	1.0251	0.523101	10	0.5427	0.356418	10
									5.605	1.0385	0.530317	10	0.5628	0.36441	10
									5.672	1.0519	0.537584	10	0.5829	0.372512	10
									5.739	1.0653	0.544901	10	0.603	0.380716	10
									5.805	1.0787	0.552266	10	0.6231	0.389017	10
									5.872	1.0921	0.559676	10	0.6432	0.397408	10
									5.939	1.1055	0.56713	10	0.6566	0.404573	10
									6.006	1.1189	0.574627	10	0.67	0.411806	10
									6.072	1.1323	0.582164	10	0.6834	0.419106	10
									6.139	1.1457	0.58974	10	0.6968	0.426467	10
									6.206	1.1591	0.597353	10	0.7102	0.433888	10
									6.272	1.1725	0.605003	10	0.7236	0.441365	10
									6.339	1.1859	0.612687	10	0.737	0.448894	10
									6.406	1.1993	0.620405	10	0.7504	0.456475	10
									6.473	1.2127	0.628155	10	0.7638	0.464104	10
									6.539	1.2261	0.635936	10	0.7772	0.471778	10
									6.606	1.2462	0.642346	10	0.7906	0.479496	10
									6.673	1.2663	0.648855	10	0.804	0.487256	10
									6.74	1.2797	0.65154	10	0.8174	0.495055	10
									6.806	1.2931	0.654336	10	0.8308	0.502892	10
									6.873	1.3065	0.657242	10	0.8442	0.510765	10
									6.94	1.3199	0.660255	10	0.8576	0.518672	10
									7.007	1.34	0.661911	10	0.871	0.526612	10
									7.073	1.3601	0.663721	10	0.8844	0.534584	10
									7.14	1.3802	0.665683	10	0.8978	0.542585	10
									7.207	1.4003	0.667797	10	0.9112	0.550615	10
									7.273	1.4137	0.671298	10	0.9246	0.558673	10
									7.34	1.4271	0.674899	10	0.938	0.566756	10
									7.407	1.4405	0.678599	10	0.9514	0.574865	10
									7.474	1.4606	0.68595	10	0.9581	0.580671	10
									7.54	1.4807	0.693374	10	0.9648	0.586496	10
									7.607	1.5008	0.700868	10	0.9715	0.592339	10
									7.674	1.5209	0.708431	10	0.9782	0.5982	10
									7.741	1.541	0.716061	10	0.9849	0.604078	10
									7.807	1.5678	0.725417	10	0.9916	0.609974	10
									7.874	1.5946	0.734818	10	0.9983	0.615886	10
									7.941	1.6482	0.738096	10	1.005	0.621814	10
									8.008	1.6549	0.752408	10	1.0117	0.627757	10
									8.074	1.6817	0.76192	10	1.0184	0.633716	10
									8.141	1.7018	0.76972	10	1.0251	0.639689	10
									8.208	1.7286	0.779289	10	1.0318	0.645677	10
									8.274	1.7554	0.788895	10	1.0385	0.651678	10
									8.341	1.7755	0.798538	10	1.0452	0.657693	10
									8.408	1.7956	0.808195	10	1.0519	0.663721	10
									8.475	1.8157	0.817867	10	1.0586	0.669762	10
									8.541	1.8358	0.827552	10	1.0653	0.675815	10
									8.608	1.8559	0.83725	10	1.072	0.68188	10
									8.675	1.876	0.846961	10	1.0787	0.687957	10
									8.742	1.8961	0.856683	10	1.0921	0.695858	10
									8.808	1.9162	0.866418	10	1.1055	0.703784	10
									8.875	1.9363	0.876164	10	1.1189	0.711733	10
									8.942	1.9564	0.885921	10	1.1323	0.719705	10
									9.009	1.9832	0.895519	10	1.1457	0.7277	10
									9.075	2.01	0.905148	10	1.1591	0.735716	10
									9.142	2.0368	0.914806	10	1.1725	0.743754	10
									9.209	2.0636	0.924492	10	1.1859	0.751811	10
									9.275	2.0904	0.934206	10	1.1993	0.759888	10
									9.342	2.1172	0.943947	10	1.2127	0.767984	10
									9.409	2.144	0.953714	10	1.2261	0.776099	10
									9.476	2.1708	0.963507	10	1.2395	0.784231	10
									9.542	2.1976	0.973323	10	1.2529	0.79238	10
									9.609	2.2244	0.983164	10	1.2663	0.800546	10
									9.676	2.2512	0.993028	10	1.2797	0.808729	10
									9.743	2.278	1.00291	10	1.2931	0.816927	10
									9.809	2.3048	1.01282	10	1.3065	0.82514	10
									9.876	2.3316	1.02275	10	1.3199	0.833369	10
									9.943	2.3584	1.0327	10	1.3333	0.841611	10
									10.01	2.3852	1.04267	10	1.3467	0.849868	10
									10.076	2.412	1.05266	10	1.3601	0.858138	10
									10.143	2.4388	1.06266	10	1.3735	0.866421	10
									10.21	2.4656	1.07269	10	1.3869	0.874717	10
									10.276	2.4924	1.08273	10	1.4003	0.883026	10
									10.343	2.5192	1.09279	10	1.4137	0.891346	10
									10.41	2.546	1.10287	10	1.4271	0.899679	10
									10.477	2.5728	1.11296	10	1.4405	0.908022	10
									10.543	2.5996	1.12307	10	1.4539	0.916377	10
									10.61	2.6264	1.1332	10	1.4673	0.924743	10
									10.677	2.6532	1.14334	10	1.4807	0.933119	10
									10.744	2.68	1.15349	10	1.4941	0.941506	10
									10.81	2.7068	1.16366	10	1.5075	0.949902	10
									10.877	2.7336	1.17384	10	1.5209	0.958308	10
									10.944	2.7604	1.18404	10	1.5276	0.964055	10
									11.011	2.7872	1.19425	10	1.5343	0.969815	10
									11.077	2.814	1.20447	10	1.541	0.975586	10
									11.144	2.8408	1.2147	10	1.5477	0.981369	10
									11.211	2.8676	1.22495	10	1.5544	0.987164	10
									11.277	2.8944	1.23521	10	1.5611	0.99297	10
									11.344	2.9212	1.24548	10	1.5678	0.998787	10
									11.411	2.948	1.25576	10	1.5745	1.00462	10
									11.478	2.9748	1.26605	10	1.5812	1.01045	10
									11.544	3.0016	1.27636	10	1.5879	1.0163	10
									11.611	3.0284	1.28667	10	1.5946	1.02216	10
									11.678	3.0552	1.297	10	1.6013	1.02804	10
									11.745	3.082	1.30733	10	1.608	1.03391	10
									11.811	3.1088	1.31767	10	1.6147	1.03981	10
									11.878	3.1356	1.32803	10	1.6214	1.04571	10
									11.945	3.1557	1.33752	10	1.6281	1.05161	10
									12.012	3.1758	1.34702	10	1.6348	1.05753	10
									12.078	3.1959	1.35654	10	1.6415	1.06346	10
									12.145	3.216	1.36606	10	1.6482	1.0694	10
									12.212	3.2361	1.3756	10	1.6549	1.07535	10
									12.278	3.2629	1.38359	10	1.6616	1.0813	10
									12.345	3.2897	1.39162	10	1.6683	1.08727	10
									12.412	3.3165	1.39969	10	1.675	1.09324	10
									12.479	3.3433	1.4078	10	1.6817	1.09922	10
									12.545	3.3701	1.41594	10	1.6884	1.10521	10
									12.612	3.3969	1.42413	10	1.6951	1.11121	10
									12.679	3.4237	1.43235	10	1.7018	1.11721	10
									12.746	3.4505	1.4406	10	1.7085	1.12322	10
									12.812	3.4773	1.4489	10	1.7152	1.12925	10
									12.879	3.5041	1.45722	10	1.7152	1.12925	10
									12.946	3.5309	1.46559	10	1.7152	1.12925	10
									13.013	3.5577	1.47398	10	1.7152	1.12925	10
									13.079	3.5845	1.48241	10	1.7152	1.12925	10
									13.146	3.618	1.49143	10	1.7152	1.12925	10
									13.213	3.6448	1.50163	10	1.7152	1.12925	10
									13.279	3.6716	1.51185	10	1.7152	1.12925	10
									13.346	3.6984	1.52207	10	1.7219	1.13527	10
									13.413	3.7252	1.53231	10	1.7286	1.14131	10
									13.48	3.752	1.54255	10	1.7353	1.14735	10
									13.546	3.7788	1.55281	10	1.742	1.1534	10
									13.613	3.8056	1.56307	10	1.7487	1.15946	10
									13.68	3.8324	1.57334	10	1.7554	1.16553	10
									13.747	3.8592	1.58363	10	1.7621	1.1716	10
									13.813	3.886	1.59392	10	1.7688	1.17768	10
									13.88	3.9128	1.60422	10	1.7755	1.18376	10
									13.947	3.9396	1.61452	10	1.7822	1.18985	10
									14.014	3.9664	1.62484	10	1.7889	1.19595	10
									14.08	3.9932	1.63517	10	1.8023	1.20096	10
									14.147	4.02	1.6455	10	1.8157	1.20602	10
									14.214	4.0535	1.65403	10	1.8291	1.21112	10
									14.28	4.087	1.6626	10	1.8425	1.21626	10
									14.347	4.1205	1.67119	10	1.8559	1.22145	10
									14.414	4.154	1.67982	10	1.8693	1.22669	10
									14.481	4.1875	1.68847	10	1.8894	1.23084	10
									14.547	4.221	1.69716	10	1.9095	1.23507	10
									14.614	4.2545	1.70587	10	1.9296	1.23936	10
									14.681	4.2813	1.71375	10	1.9497	1.24373	10
									14.748	4.3081	1.72167	10	1.9698	1.24816	10
									14.814	4.3349	1.72962	10	1.9899	1.25266	10
									14.881	4.3617	1.7376	10	2.01	1.25723	10
									14.948	4.3885	1.74561	10	2.0234	1.26276	10
									15.015	4.4153	1.75366	10	2.0368	1.26834	10
									15.081	4.4354	1.7592	10	2.0502	1.27395	10
									15.148	4.4555	1.76479	10	2.0636	1.2796	10
									15.215	4.4756	1.77042	10	2.077	1.28528	10
									15.281	4.4957	1.77609	10	2.0904	1.29101	10
									15.348	4.5158	1.78181	10	2.1038	1.29676	10
									15.415	4.5359	1.78756	10	2.1172	1.30256	10
									15.482	4.5627	1.79406	10	2.1306	1.30839	10
									15.548	4.5895	1.80061	10	2.1507	1.31306	10
									15.615	4.6163	1.80719	10	2.1708	1.31779	10
									15.682	4.6431	1.81382	10	2.1909	1.32258	10
									15.749	4.6699	1.82049	10	2.211	1.32743	10
									15.815	4.6967	1.8272	10	2.2311	1.33235	10
									15.882	4.7235	1.83395	10	2.2512	1.33733	10
									15.949	4.7503	1.84075	10	2.2713	1.34236	10
									16.016	4.7771	1.84758	10	2.2914	1.34745	10
									16.082	4.8106	1.85253	10	2.3115	1.35261	10
									16.149	4.8441	1.85754	10	2.3316	1.35781	10
									16.216	4.8776	1.8626	10	2.3517	1.36308	10
									16.282	4.9111	1.86771	10	2.3718	1.36841	10
									16.349	4.9446	1.87288	10	2.3852	1.37383	10
									16.416	4.9781	1.8781	10	2.3986	1.37928	10
									16.483	5.0116	1.88337	10	2.412	1.38478	10
									16.549	5.0451	1.88869	10	2.4254	1.3903	10
									16.616	5.0786	1.89407	10	2.4388	1.39587	10
									16.683	5.1121	1.89949	10	2.4522	1.40147	10
									16.75	5.1456	1.90496	10	2.4656	1.4071	10
									16.816	5.1791	1.91049	10	2.479	1.41277	10
									16.883	5.2126	1.91606	10	2.4924	1.41847	10
									16.95	5.2461	1.92168	10	2.5058	1.4242	10
									17.017	5.2796	1.92735	10	2.5192	1.42997	10
									17.083	5.3131	1.93307	10	2.5326	1.43577	10
									17.15	5.3466	1.93883	10	2.546	1.4416	10
									17.217	5.3801	1.94464	10	2.5594	1.44746	10
									17.283	5.4136	1.9505	10	2.5728	1.45336	10
									17.35	5.4471	1.95641	10	2.5862	1.45928	10
									17.417	5.4806	1.96236	10	2.5996	1.46524	10
									17.484	5.5141	1.96835	10	2.613	1.47122	10
									17.55	5.5476	1.97439	10	2.6264	1.47724	10
									17.617	5.5811	1.98048	10	2.6398	1.48328	10
									17.684	5.6146	1.98661	10	2.6532	1.48936	10
									17.751	5.6414	1.99355	10	2.6666	1.49546	10
									17.817	5.6682	2.00053	10	2.68	1.50159	10
									17.884	5.695	2.00754	10	2.6934	1.50775	10
									17.951	5.7218	2.01459	10	2.7068	1.51394	10
									18.018	5.7419	2.02306	10	2.7202	1.52015	10
									18.084	5.762	2.03155	10	2.7336	1.52639	10
									18.151	5.7821	2.04005	10	2.747	1.53266	10
									18.218	5.8089	2.04718	10	2.7671	1.53873	10
									18.284	5.8357	2.05434	10	2.7872	1.54485	10
									18.351	5.8625	2.06153	10	2.8073	1.55102	10
									18.418	5.8893	2.06876	10	2.8274	1.55722	10
									18.485	5.9161	2.07602	10	2.8475	1.56347	10
									18.551	5.9429	2.08331	10	2.8676	1.56976	10
									18.618	5.9697	2.09063	10	2.8877	1.57609	10
									18.685	6.0099	2.09869	10	2.9078	1.58246	10
									18.752	6.0501	2.10678	10	2.9279	1.58887	10
									18.818	6.0903	2.1149	10	2.9413	1.59534	10
									18.885	6.1305	2.12304	10	2.9547	1.60183	10
									18.952	6.1707	2.1312	10	2.9681	1.60834	10
									19.019	6.2109	2.13939	10	2.9815	1.61488	10
									19.085	6.2511	2.1476	10	2.9949	1.62144	10
									19.152	6.2913	2.15584	10	3.0083	1.62802	10
									19.219	6.3315	2.16411	10	3.0217	1.63462	10
									19.285	6.365	2.17353	10	3.0351	1.64125	10
									19.352	6.3985	2.18297	10	3.0485	1.6479	10
									19.419	6.432	2.19242	10	3.0619	1.65457	10
									19.486	6.4655	2.2019	10	3.0753	1.66126	10
									19.552	6.499	2.21138	10	3.0887	1.66797	10
									19.619	6.5325	2.22089	10	3.1021	1.6747	10
									19.686	6.566	2.23041	10	3.1155	1.68146	10
									19.753	6.5995	2.23994	10	3.1289	1.68823	10
									19.819	6.633	2.24949	10	3.1423	1.69502	10
									19.886	6.6665	2.25905	10	3.1557	1.70184	10
									19.953	6.7	2.26863	10	3.1691	1.70867	10
									20.02	6.7335	2.27822	10	3.1825	1.71552	10
									20.086	6.767	2.28783	10	3.1959	1.72239	10
									20.153	6.8005	2.29745	10	3.2093	1.72928	10
									20.22	6.834	2.30709	10	3.2294	1.73482	10
									20.286	6.8675	2.31674	10	3.2495	1.7404	10
									20.353	6.901	2.3264	10	3.2629	1.74735	10
									20.42	6.9345	2.33608	10	3.2763	1.75431	10
									20.487	6.968	2.34577	10	3.2897	1.76129	10
									20.553	7.0015	2.35547	10	3.3031	1.76829	10
									20.62	7.035	2.36518	10	3.3165	1.7753	10
									20.687	7.0685	2.37491	10	3.3299	1.78234	10
									20.754	7.0953	2.38123	10	3.3433	1.78939	10
									20.82	7.1221	2.38758	10	3.3567	1.79645	10
									20.887	7.1489	2.39396	10	3.3701	1.80353	10
									20.954	7.1757	2.40038	10	3.3835	1.81063	10
									21.021	7.2025	2.40683	10	3.3969	1.81775	10
									21.087	7.2293	2.41331	10	3.4103	1.82488	10
									21.154	7.2561	2.41983	10	3.4237	1.83203	10
									21.221	7.2829	2.42637	10	3.4371	1.83919	10
									21.287	7.3097	2.43295	10	3.4505	1.84637	10
									21.354	7.3365	2.43956	10	3.4639	1.85356	10
									21.421	7.3633	2.4462	10	3.4773	1.86077	10
									21.488	7.3901	2.45287	10	3.4907	1.86799	10
									21.554	7.4169	2.45957	10	3.5041	1.87523	10
									21.621	7.4437	2.4663	10	3.5175	1.8806	10
									21.688	7.4705	2.47306	10	3.5309	1.886	10
									21.755	7.4973	2.47985	10	3.5443	1.89142	10
									21.821	7.5174	2.48515	10	3.5577	1.89687	10
									21.888	7.5375	2.49047	10	3.5711	1.90235	10
									21.955	7.5576	2.49712	10	3.5845	1.90785	10
									22.022	7.5777	2.50379	10	3.6046	1.91437	10
									22.088	7.5978	2.51049	10	3.6247	1.92091	10
									22.155	7.6246	2.5187	10	3.6515	1.92609	10
									22.222	7.6514	2.52692	10	3.6783	1.93132	10
									22.288	7.6782	2.53517	10	3.7051	1.9366	10
									22.355	7.705	2.54343	10	3.7319	1.94192	10
									22.422	7.7318	2.55172	10	3.7587	1.94729	10
									22.489	7.7586	2.56002	10	3.7855	1.95271	10
									22.555	7.7854	2.56835	10	3.819	1.95674	10
									22.622	7.8122	2.57669	10	3.8525	1.96082	10
									22.689	7.839	2.58506	10	3.886	1.96495	10
									22.756	7.8658	2.59344	10	3.9195	1.96914	10
									22.822	7.8926	2.60184	10	3.9463	1.9739	10
									22.889	7.9194	2.61027	10	3.9731	1.97871	10
									22.956	7.9462	2.6187	10	3.9999	1.98357	10
									23.023	7.973	2.62716	10	4.02	1.98226	10
									23.089	7.9998	2.63564	10	4.0401	1.98101	10
									23.156	8.0266	2.64413	10	4.0602	1.9798	10
									23.223	8.0534	2.65265	10	4.0803	1.97865	10
									23.289	8.0802	2.66118	10	4.1004	1.97755	10
									23.356	8.107	2.66973	10	4.1272	1.97501	10
									23.423	8.1338	2.67829	10	4.1607	1.97873	10
									23.49	8.1606	2.68687	10	4.1942	1.9825	10
									23.556	8.1874	2.69547	10	4.2277	1.98632	10
									23.623	8.2142	2.70409	10	4.2612	1.99021	10
									23.69	8.241	2.71272	10	4.2947	1.99414	10
									23.757	8.2678	2.72137	10	4.3282	1.99813	10
									23.823	8.2946	2.73004	10	4.3617	2.00218	10
									23.89	8.3214	2.73872	10	4.3952	2.00628	10
									23.957	8.3482	2.74742	10	4.4287	2.01043	10
									24.024	8.375	2.75614	10	4.4622	2.01464	10
									24.09	8.4018	2.76487	10	4.5024	2.01725	10
									24.157	8.4286	2.77361	10	4.5426	2.01992	10
									24.224	8.4554	2.78238	10	4.5828	2.02265	10
									24.29	8.4822	2.79115	10	4.623	2.02542	10
									24.357	8.509	2.79995	10	4.6632	2.02826	10
									24.424	8.5358	2.80875	10	4.7034	2.03115	10
									24.491	8.5626	2.81758	10	4.7436	2.0341	10
									24.557	8.5894	2.82641	10	4.7838	2.03709	10
									24.624	8.6162	2.83526	10	4.824	2.04015	10
									24.691	8.6497	2.84187	10	4.8642	2.04325	10
									24.758	8.6832	2.84851	10	4.9044	2.04642	10
									24.824	8.7167	2.85518	10	4.9446	2.04963	10
									24.891	8.7502	2.86188	10	4.9848	2.0529	10
									24.958	8.7837	2.8686	10	5.025	2.05622	10
									25.025	8.8172	2.87535	10	5.0652	2.05959	10
									25.091	8.8507	2.88213	10	5.1054	2.06302	10
									25.158	8.8842	2.88894	10	5.1456	2.0665	10
									25.225	8.9177	2.89577	10	5.1858	2.07003	10
									25.291	8.9512	2.90263	10	5.226	2.07361	10
									25.358	8.9847	2.90952	10	5.2662	2.07725	10
									25.425	9.0182	2.91643	10	5.3064	2.08093	10
									25.492	9.0517	2.92337	10	5.3466	2.08467	10
									25.558	9.0852	2.93034	10	5.3868	2.08845	10
									25.625	9.112	2.93363	10	5.427	2.09229	10
									25.692	9.1388	2.93697	10	5.4672	2.09618	10
									25.759	9.1656	2.94034	10	5.5074	2.10011	10
									25.825	9.1924	2.94375	10	5.5409	2.10254	10
									25.892	9.2192	2.94719	10	5.5744	2.10502	10
									25.959	9.2393	2.95267	10	5.6079	2.10756	10
									26.026	9.2594	2.95818	10	5.6414	2.11016	10
									26.092	9.2862	2.96733	10	5.6749	2.11281	10
									26.159	9.3197	2.97449	10	5.7084	2.11552	10
									26.226	9.3532	2.98167	10	5.7419	2.11828	10
									26.292	9.3867	2.98887	10	5.7821	2.12256	10
									26.359	9.4135	2.99249	10	5.8223	2.12689	10
									26.426	9.4403	2.99614	10	5.8625	2.13127	10
									26.493	9.4671	2.99983	10	5.896	2.13636	10
									26.559	9.4939	3.00355	10	5.9295	2.14149	10
									26.626	9.5207	3.00731	10	5.963	2.14667	10
									26.693	9.5542	3.01466	10	5.9965	2.1519	10
									26.76	9.5877	3.02203	10	6.03	2.15717	10
									26.826	9.6212	3.02943	10	6.0635	2.16249	10
									26.893	9.6547	3.03685	10	6.097	2.16785	10
									26.96	9.6882	3.04429	10	6.1305	2.17326	10
									27.027	9.7284	3.05273	10	6.164	2.17871	10
									27.093	9.7686	3.06118	10	6.1975	2.1842	10
									27.16	9.8088	3.06965	10	6.231	2.18974	10
									27.227	9.849	3.07813	10	6.2645	2.19532	10
									27.293	9.8892	3.08663	10	6.298	2.20094	10
									27.36	9.9294	3.09514	10	6.3315	2.2066	10
									27.427	9.9696	3.10367	10	6.365	2.21231	10
									27.494	10.0098	3.11222	10	6.3985	2.21806	10
									27.56	10.05	3.12078	10	6.432	2.22384	10
									27.627	10.0902	3.12935	10	6.4655	2.22967	10
									27.694	10.1237	3.13442	10	6.499	2.23554	10
									27.761	10.1572	3.13952	10	6.5325	2.24145	10
									27.827	10.1907	3.14465	10	6.566	2.2474	10
									27.894	10.2242	3.14981	10	6.5995	2.25339	10
									27.961	10.2577	3.155	10	6.633	2.25942	10
									28.028	10.2912	3.16023	10	6.6598	2.26637	10
									28.094	10.3247	3.16548	10	6.6866	2.27335	10
									28.161	10.3582	3.17077	10	6.7134	2.28036	10
									28.228	10.3917	3.17609	10	6.7402	2.2874	10
									28.294	10.4252	3.18143	10	6.767	2.29447	10
									28.361	10.4587	3.18681	10	6.7938	2.30157	10
									28.428	10.4922	3.19222	10	6.8206	2.3087	10
									28.495	10.5257	3.19765	10	6.8474	2.31587	10
									28.561	10.5592	3.20312	10	6.8742	2.32306	10
									28.628	10.5927	3.20862	10	6.901	2.33028	10
									28.695	10.6262	3.21414	10	6.9278	2.33753	10
									28.762	10.6597	3.2197	10	6.9546	2.3448	10
									28.828	10.6932	3.22528	10	6.9814	2.35211	10
									28.895	10.7267	3.23089	10	7.0149	2.35881	10
									28.962	10.7602	3.23653	10	7.0417	2.36593	10
									29.029	10.7937	3.2422	10	7.0685	2.37308	10
									29.095	10.8272	3.2479	10	7.0953	2.38027	10
									29.162	10.8607	3.25363	10	7.1221	2.38747	10
									29.229	10.8942	3.25938	10	7.1489	2.39471	10
									29.295	10.9277	3.26517	10	7.169	2.40018	10
									29.362	10.9612	3.27098	10	7.1891	2.40569	10
									29.429	10.9947	3.27682	10	7.2092	2.41122	10
									29.496	11.0282	3.28268	10	7.2293	2.41678	10
									29.562	11.0617	3.28858	10	7.2427	2.42231	10
									29.629	11.0952	3.2945	10	7.2561	2.42785	10
									29.696	11.122	3.29926	10	7.2695	2.43342	10
									29.763	11.1488	3.30405	10	7.2829	2.439	10
									29.829	11.1756	3.30888	10	7.303	2.4436	10
									29.896	11.2024	3.31372	10	7.3298	2.44994	10
									29.963	11.2292	3.3186	10	7.3566	2.45632	10
									30.03	11.256	3.32351	10	7.3834	2.46273	10
									30.096	11.2828	3.32845	10	7.4102	2.46917	10
									30.163	11.3096	3.33341	10	7.437	2.47564	10
									30.23	11.3364	3.33841	10	7.4638	2.48214	10
									30.296	11.3632	3.34343	10	7.4906	2.48868	10
									30.363	11.39	3.34848	10	7.5241	2.49523	10
									30.43	11.4168	3.35356	10	7.5576	2.50181	10
									30.497	11.4436	3.35867	10	7.5911	2.50842	10
									30.563	11.4704	3.3638	10	7.6246	2.51507	10
									30.63	11.4972	3.36896	10	7.6581	2.52175	10
									30.697	11.524	3.37415	10	7.6916	2.52846	10
									30.764	11.5508	3.37937	10	7.7251	2.5352	10
									30.83	11.5776	3.38461	10	7.7586	2.54198	10
									30.897	11.6044	3.38989	10	7.7921	2.54878	10
									30.964	11.6312	3.39518	10	7.8256	2.55562	10
									31.031	11.658	3.40051	10	7.8591	2.56248	10
									31.097	11.6848	3.40586	10	7.8792	2.57034	10
									31.164	11.7116	3.41124	10	7.8993	2.57821	10
									31.231	11.7384	3.41665	10	7.9194	2.5861	10
									31.297	11.7652	3.42208	10	7.9395	2.594	10
									31.364	11.792	3.42754	10	7.9596	2.60192	10
									31.431	11.8188	3.43302	10	7.9797	2.60986	10
									31.498	11.8456	3.43853	10	7.9998	2.61781	10
									31.564	11.8657	3.44518	10	8.0199	2.62578	10
									31.631	11.8858	3.45184	10	8.0467	2.63261	10
									31.698	11.9059	3.45852	10	8.0735	2.63948	10
									31.765	11.9327	3.46618	10	8.1003	2.64637	10
									31.831	11.9595	3.47385	10	8.1271	2.65329	10
									31.898	11.9863	3.48154	10	8.1472	2.66	10
									31.965	12.0198	3.48812	10	8.1673	2.66672	10
									32.032	12.0533	3.49473	10	8.1807	2.67453	10
									32.098	12.0801	3.49912	10	8.1941	2.68235	10
									32.165	12.1069	3.50353	10	8.2008	2.68822	10
									32.232	12.1337	3.50798	10	8.2075	2.69409	10
									32.298	12.1605	3.51245	10	8.2142	2.69997	10
									32.365	12.1873	3.51695	10	8.2343	2.70502	10
									32.432	12.2141	3.52148	10	8.2544	2.71009	10
									32.499	12.2409	3.52604	10	8.2745	2.71519	10
									32.565	12.2677	3.53062	10	8.2946	2.72032	10
									32.632	12.2945	3.53524	10	8.3147	2.72548	10
									32.699	12.3213	3.53988	10	8.3348	2.73067	10
									32.766	12.3481	3.54455	10	8.3482	2.73685	10
									32.832	12.3749	3.54924	10	8.3616	2.74305	10
									32.899	12.4017	3.55397	10	8.375	2.74927	10
									32.966	12.4285	3.55872	10	8.3884	2.7555	10
									33.033	12.4553	3.5635	10	8.4018	2.76174	10
									33.099	12.4821	3.56831	10	8.4152	2.768	10
									33.166	12.5089	3.57314	10	8.4286	2.77428	10
									33.233	12.5357	3.578	10	8.442	2.78057	10
									33.299	12.5625	3.58289	10	8.4554	2.78687	10
									33.366	12.5893	3.5878	10	8.4688	2.79319	10
									33.433	12.6161	3.59274	10	8.4822	2.79952	10
									33.5	12.6429	3.59771	10	8.4956	2.80587	10
									33.566	12.6697	3.6027	10	8.509	2.81223	10
									33.633	12.6965	3.60772	10	8.5224	2.8186	10
									33.7	12.7233	3.61276	10	8.5358	2.82499	10
									33.767	12.7501	3.61783	10	8.5425	2.8309	10
									33.833	12.7769	3.62293	10	8.5492	2.83681	10
									33.9	12.8037	3.62806	10	8.5559	2.84273	10
									33.967	12.8305	3.6332	10	8.5626	2.84865	10
									34.034	12.8573	3.63838	10	8.576	2.85505	10
									34.1	12.8841	3.64358	10	8.5827	2.86098	10
									34.167	12.9109	3.6488	10	8.5827	2.86098	10
									34.234	12.9377	3.65406	10	8.5827	2.86098	10
									34.3	12.9645	3.65933	10	8.5827	2.86098	10
									34.367	12.9913	3.66463	10	8.5827	2.86098	10
									34.434	13.0181	3.66996	10	8.5827	2.86098	10
									34.501	13.0449	3.67531	10	8.5827	2.86098	10
									34.567	13.0717	3.68069	10	8.5827	2.86098	10
									34.634	13.0985	3.68609	10	8.5827	2.86098	10
									34.701	13.1253	3.69151	10	8.5894	2.8669	10
									34.768	13.1454	3.69563	10	8.5961	2.87283	10
									34.834	13.1655	3.69978	10	8.6028	2.87877	10
									34.901	13.1856	3.70395	10	8.6028	2.87877	10
									34.968	13.2057	3.70815	10	8.6095	2.8779	10
									35.035	13.2258	3.71236	10	8.6162	2.87705	10
									35.101	13.2459	3.71661	10	8.6229	2.87622	10
									35.168	13.266	3.72087	10	8.6296	2.8754	10
									35.235	13.2861	3.72516	10	8.6363	2.87459	10
									35.301	13.3062	3.72947	10	8.643	2.87381	10
									35.368	13.3263	3.7338	10	8.6497	2.87303	10
									35.435	13.3464	3.73816	10	8.6564	2.87228	10
									35.502	13.3732	3.74381	10	8.6631	2.87153	10
									35.568	13.4	3.74947	10	8.6698	2.87081	10
									35.635	13.4268	3.75516	10	8.6765	2.87009	10
									35.702	13.4536	3.76088	10	8.6832	2.8694	10
									35.769	13.4804	3.76662	10	8.6899	2.86872	10
									35.835	13.5072	3.77238	10	8.6966	2.86805	10
									35.902	13.534	3.77816	10	8.7033	2.8674	10
									35.969	13.5608	3.78397	10	8.71	2.86677	10
									36.036	13.5876	3.7898	10	8.7167	2.86615	10
									36.102	13.6144	3.79565	10	8.7234	2.86555	10
									36.169	13.6412	3.80153	10	8.7301	2.86496	10
									36.236	13.668	3.80742	10	8.7368	2.86439	10
									36.302	13.6948	3.81334	10	8.7435	2.86383	10
									36.369	13.7216	3.81928	10	8.7502	2.86329	10
									36.436	13.7484	3.82525	10	8.7569	2.86277	10
									36.503	13.7752	3.83123	10	8.7636	2.86226	10
									36.569	13.802	3.83724	10	8.7703	2.86176	10
									36.636	13.8288	3.84327	10	8.7837	2.86721	10
									36.703	13.8556	3.84932	10	8.7971	2.87268	10
									36.77	13.8824	3.85539	10	8.8105	2.87816	10
									36.836	13.9092	3.86149	10	8.8239	2.88367	10
									36.903	13.9293	3.86614	10	8.8373	2.88918	10
									36.97	13.9494	3.87081	10	8.8507	2.89472	10
									37.037	13.9695	3.8755	10	8.8641	2.90028	10
									37.103	13.9896	3.88022	10	8.8775	2.90584	10
									37.17	14.0097	3.88495	10	8.8909	2.91143	10
									37.237	14.0298	3.88971	10	8.9043	2.91703	10
									37.303	14.0499	3.89449	10	8.9177	2.92265	10
									37.37	14.0767	3.90071	10	8.9311	2.92829	10
									37.437	14.1035	3.90696	10	8.9445	2.93395	10
									37.504	14.1303	3.91322	10	8.9579	2.93961	10
									37.57	14.1571	3.91951	10	8.9713	2.9453	10
									37.637	14.1839	3.92582	10	8.9847	2.951	10
									37.704	14.2107	3.93214	10	8.9981	2.95672	10
									37.771	14.2375	3.93849	10	9.0048	2.96269	10
									37.837	14.2643	3.94486	10	9.0115	2.96866	10
									37.904	14.2911	3.95125	10	9.0182	2.97463	10
									37.971	14.3179	3.95765	10	9.0249	2.98061	10
									38.038	14.3447	3.96408	10	9.0316	2.98659	10
									38.104	14.3715	3.97053	10	9.0383	2.99257	10
									38.171	14.3983	3.977	10	9.045	2.99856	10
									38.238	14.4251	3.98348	10	9.0517	3.00455	10
									38.304	14.4519	3.98999	10	9.0584	3.01054	10
									38.371	14.4787	3.99651	10	9.0651	3.01654	10
									38.438	14.5055	4.00306	10	9.0718	3.02254	10
									38.505	14.5323	4.00962	10	9.0718	3.02254	10
									38.571	14.5591	4.0162	10	9.0718	3.02254	10
									38.638	14.5926	4.02429	10	9.0718	3.02254	10
									38.705	14.6261	4.03239	10	9.0718	3.02254	10
									38.772	14.6596	4.0405	10	9.0718	3.02254	10
									38.838	14.6931	4.04863	10	9.0718	3.02254	10
									38.905	14.7266	4.05678	10	9.0718	3.02254	10
									38.972	14.7601	4.06494	10	9.0718	3.02254	10
									39.039	14.7936	4.07311	10	9.0718	3.02254	10
									39.105	14.8271	4.0813	10	9.0718	3.02254	10
									39.172	14.8606	4.0895	10	9.0718	3.02254	10
									39.239	14.8941	4.09771	10	9.0718	3.02254	10
									39.305	14.9276	4.10594	10	9.0718	3.02254	10
									39.372	14.9611	4.11419	10	9.0718	3.02254	10
									39.439	14.9946	4.12244	10	9.0718	3.02254	10
									39.506	15.0281	4.13071	10	9.0718	3.02254	10
									39.572	15.0616	4.139	10	9.0718	3.02254	10
									39.639	15.0951	4.14729	10	9.0718	3.02254	10
									39.706	15.1286	4.15561	10	9.0718	3.02254	10
									39.773	15.1621	4.16393	10	9.0718	3.02254	10
									39.839	15.1956	4.17227	10	9.0718	3.02254	10
									39.906	15.2291	4.18062	10	9.0718	3.02254	10
									39.973	15.2693	4.18681	10	9.0718	3.02254	10
									40.04	15.3095	4.19302	10	9.0718	3.02254	10
									40.106	15.3497	4.19925	10	9.0718	3.02254	10
									40.173	15.3966	4.20278	10	9.0718	3.02254	10
									40.24	15.4435	4.20634	10	9.0718	3.02254	10
									40.306	15.4904	4.20991	10	9.0718	3.02254	10
									40.373	15.5373	4.21351	10	9.0718	3.02254	10
									40.44	15.5842	4.21713	10	9.0718	3.02254	10
									40.507	15.6311	4.22076	10	9.0718	3.02254	10
									40.573	15.678	4.21817	10	9.0718	3.02254	10
									40.64	15.7249	4.21561	10	9.0718	3.02254	10
									40.707	15.7718	4.21307	10	9.0718	3.02254	10
									40.774	15.8187	4.21055	10	9.0718	3.02254	10
									40.84	15.8656	4.20805	10	9.0718	3.02254	10
									40.907	15.9125	4.20558	10	9.0718	3.02254	10
									40.974	15.9527	4.20153	10	9.0718	3.02254	10
									41.041	15.9862	4.19754	10	9.0718	3.02254	10
									41.107	16.0197	4.19357	10	9.0718	3.02254	10
									41.174	16.0599	4.19331	10	9.0718	3.02254	10
									41.241	16.1001	4.19307	10	9.0718	3.02254	10
									41.307	16.1403	4.19286	10	9.0718	3.02254	10
									41.374	16.1805	4.19268	10	9.0718	3.02254	10
									41.441	16.2274	4.19246	10	9.0718	3.02254	10
									41.508	16.2676	4.19475	10	9.0718	3.02254	10
									41.574	16.3078	4.19708	10	9.0718	3.02254	10
									41.641	16.348	4.19943	10	9.0718	3.02254	10
									41.708	16.3882	4.2018	10	9.0718	3.02254	10
									41.775	16.4284	4.20421	10	9.0718	3.02254	10
									41.841	16.4686	4.20664	10	9.0718	3.02254	10
									41.908	16.5155	4.21059	10	9.0718	3.02254	10
									41.975	16.5624	4.21457	10	9.0718	3.02254	10
									42.042	16.6093	4.21856	10	9.0718	3.02254	10
									42.108	16.6562	4.22257	10	9.0718	3.02254	10
									42.175	16.7031	4.22661	10	9.0718	3.02254	10
									42.242	16.75	4.23067	10	9.0718	3.02254	10
									42.308	16.7969	4.23475	10	9.0718	3.02254	10
									42.375	16.8438	4.23884	10	9.0718	3.02254	10
									42.442	16.8907	4.24296	10	9.0718	3.02254	10
									42.509	16.9376	4.2471	10	9.0718	3.02254	10
									42.575	16.9845	4.25126	10	9.0718	3.02254	10
									42.642	17.0314	4.25544	10	9.0718	3.02254	10
									42.709	17.0783	4.25965	10	9.0718	3.02254	10
									42.776	17.1252	4.26387	10	9.0718	3.02254	10
									42.842	17.1721	4.26811	10	9.0718	3.02254	10
									42.909	17.219	4.27237	10	9.0718	3.02254	10
									42.976	17.2659	4.27666	10	9.0718	3.02254	10
									43.043	17.3128	4.28096	10	9.0718	3.02254	10
									43.109	17.3597	4.28528	10	9.0718	3.02254	10
									43.176	17.4066	4.28963	10	9.0718	3.02254	10
									43.243	17.4535	4.29399	10	9.0718	3.02254	10
									43.309	17.4937	4.30029	10	9.0718	3.02254	10
									43.376	17.5339	4.30662	10	9.0718	3.02254	10
									43.443	17.5741	4.31296	10	9.0718	3.02254	10
									43.51	17.6143	4.31932	10	9.0718	3.02254	10
									43.576	17.6478	4.32564	10	9.0718	3.02254	10
									43.643	17.6813	4.33198	10	9.0718	3.02254	10
									43.71	17.7081	4.33658	10	9.0718	3.02254	10
									43.777	17.7349	4.3412	10	9.0718	3.02254	10
									43.843	17.7617	4.34584	10	9.0718	3.02254	10
									43.91	17.7885	4.35051	10	9.0718	3.02254	10
									43.977	17.8153	4.3552	10	9.0718	3.02254	10
									44.044	17.8421	4.35991	10	9.0718	3.02254	10
									44.11	17.8689	4.36465	10	9.0718	3.02254	10
									44.177	17.8957	4.3694	10	9.0718	3.02254	10
									44.244	17.9225	4.37418	10	9.0718	3.02254	10
									44.31	17.9493	4.37898	10	9.0718	3.02254	10
									44.377	17.9828	4.3855	10	9.0718	3.02254	10
									44.444	18.0163	4.39204	10	9.0718	3.02254	10
									44.511	18.0498	4.39859	10	9.0718	3.02254	10
									44.577	18.0833	4.40517	10	9.0718	3.02254	10
									44.644	18.1168	4.41176	10	9.0718	3.02254	10
									44.711	18.1503	4.41837	10	9.0718	3.02254	10
									44.778	18.1838	4.425	10	9.0718	3.02254	10
									44.844	18.2173	4.43165	10	9.0718	3.02254	10
									44.911	18.2508	4.43832	10	9.0718	3.02254	10
									44.978	18.2843	4.445	10	9.0718	3.02254	10
									45.045	18.3178	4.4517	10	9.0718	3.02254	10
									45.111	18.3513	4.45842	10	9.0785	3.02406	10
									45.178	18.3848	4.46516	10	9.0852	3.02559	10
									45.245	18.4183	4.47192	10	9.0919	3.02714	10
									45.311	18.4518	4.47869	10	9.0986	3.0287	10
									45.378	18.4853	4.48548	10	9.1053	3.03027	10
									45.445	18.5188	4.49229	10	9.112	3.03186	10
									45.512	18.5523	4.49912	10	9.1187	3.03346	10
									45.578	18.5858	4.50596	10	9.1254	3.03508	10
									45.645	18.6193	4.51282	10	9.1388	3.03589	10
									45.712	18.6595	4.51959	10	9.1522	3.03673	10
									45.779	18.7064	4.5233	10	9.1656	3.03759	10
									45.845	18.7533	4.52703	10	9.179	3.03848	10
									45.912	18.7935	4.52911	10	9.1924	3.0394	10
									45.979	18.8337	4.53122	10	9.2058	3.04034	10
									46.046	18.8739	4.53335	10	9.2192	3.04131	10
									46.112	18.9074	4.53559	10	9.2326	3.0423	10
									46.179	18.9409	4.53786	10	9.246	3.04332	10
									46.246	18.9744	4.54015	10	9.2594	3.04437	10
									46.312	19.0079	4.54247	10	9.2728	3.04544	10
									46.379	19.0414	4.54482	10	9.2862	3.04653	10
									46.446	19.0749	4.54719	10	9.2996	3.04766	10
									46.513	19.1084	4.54959	10	9.313	3.04881	10
									46.579	19.1419	4.55201	10	9.3264	3.04998	10
									46.646	19.1754	4.55447	10	9.3398	3.05118	10
									46.713	19.2089	4.55694	10	9.3532	3.05241	10
									46.78	19.2424	4.55945	10	9.3666	3.05366	10
									46.846	19.2759	4.56197	10	9.38	3.05494	10
									46.913	19.3094	4.56453	10	9.3934	3.05624	10
									46.98	19.3429	4.56711	10	9.4068	3.05757	10
									47.047	19.3764	4.56972	10	9.4202	3.05892	10
									47.113	19.4099	4.57235	10	9.4336	3.0603	10
									47.18	19.4434	4.57501	10	9.447	3.0617	10
									47.247	19.4769	4.57769	10	9.4604	3.06313	10
									47.313	19.5104	4.5804	10	9.4671	3.06265	10
									47.38	19.5439	4.58314	10	9.4738	3.06218	10
									47.447	19.5774	4.5859	10	9.4805	3.06172	10
									47.514	19.6109	4.58868	10	9.4872	3.06128	10
									47.58	19.6444	4.59149	10	9.4939	3.06086	10
									47.647	19.6779	4.59433	10	9.5006	3.06045	10
									47.714	19.7114	4.59719	10	9.5073	3.06005	10
									47.781	19.7449	4.60008	10	9.514	3.05967	10
									47.847	19.7784	4.60299	10	9.5207	3.0593	10
									47.914	19.8119	4.60593	10	9.5274	3.05895	10
									47.981	19.8454	4.6089	10	9.5341	3.05861	10
									48.048	19.8789	4.61189	10	9.5408	3.05828	10
									48.114	19.9124	4.6149	10	9.5475	3.05797	10
									48.181	19.9459	4.61794	10	9.5542	3.05768	10
									48.248	19.9794	4.621	10	9.5609	3.0574	10
									48.314	20.0129	4.62409	10	9.5676	3.05714	10
									48.381	20.0464	4.6272	10	9.5743	3.05688	10
									48.448	20.0799	4.63034	10	9.581	3.05665	10
									48.515	20.1134	4.63351	10	9.5877	3.05643	10
									48.581	20.1469	4.63669	10	9.5944	3.05622	10
									48.648	20.1804	4.63991	10	9.6011	3.05603	10
									48.715	20.2139	4.64314	10	9.6078	3.05585	10
									48.782	20.2474	4.6464	10	9.6145	3.05569	10
									48.848	20.2809	4.64969	10	9.6212	3.05554	10
									48.915	20.3144	4.653	10	9.6279	3.05541	10
									48.982	20.3479	4.65634	10	9.6346	3.05529	10
									49.049	20.3814	4.6597	10	9.6413	3.05519	10
									49.115	20.4082	4.66111	10	9.648	3.0551	10
									49.182	20.435	4.66256	10	9.6547	3.05502	10
									49.249	20.4618	4.66402	10	9.6614	3.05497	10
									49.315	20.4886	4.66552	10	9.6681	3.05492	10
									49.382	20.5154	4.66703	10	9.6748	3.05489	10
									49.449	20.5422	4.66858	10	9.6815	3.05487	10
									49.516	20.569	4.67014	10	9.6815	3.05487	10
									49.582	20.5958	4.67174	10	9.6815	3.05487	10
									49.649	20.6226	4.67336	10	9.6815	3.05487	10
									49.716	20.6494	4.675	10	9.6815	3.05487	10
									49.783	20.6762	4.67667	10	9.6815	3.05487	10
									49.849	20.703	4.67836	10	9.6815	3.05487	10
									49.916	20.7298	4.68008	10	9.6815	3.05487	10
									49.983	20.7566	4.68182	10	9.6815	3.05487	10
									50.05	20.7834	4.68359	10	9.6815	3.05487	10
									50.116	20.8102	4.68538	10	9.6815	3.05487	10
									50.183	20.837	4.6872	10	9.6815	3.05487	10
									50.25	20.8638	4.68905	10	9.6815	3.05487	10
									50.316	20.8906	4.69091	10	9.6815	3.05487	10
									50.383	20.9174	4.6928	10	9.6815	3.05487	10
									50.45	20.9375	4.69254	10	9.6815	3.05487	10
									50.517	20.9576	4.69231	10	9.6815	3.05487	10
									50.583	20.9777	4.69209	10	9.6815	3.05487	10
									50.65	20.9978	4.69189	10	9.6815	3.05487	10
									50.717	21.0179	4.69172	10	9.6815	3.05487	10
									50.784	21.038	4.69157	10	9.6815	3.05487	10
									50.85	21.0581	4.69145	10	9.6815	3.05487	10
									50.917	21.0782	4.69134	10	9.6815	3.05487	10
									50.984	21.0983	4.69126	10	9.6815	3.05487	10
									51.051	21.1251	4.6882	10	9.6815	3.05487	10
									51.117	21.1519	4.68517	10	9.6815	3.05487	10
									51.184	21.1787	4.68216	10	9.6815	3.05487	10
									51.251	21.2055	4.67917	10	9.6815	3.05487	10
									51.317	21.2323	4.67621	10	9.6815	3.05487	10
									51.384	21.2591	4.67327	10	9.6815	3.05487	10
									51.451	21.2859	4.67036	10	9.6815	3.05487	10
									51.518	21.3127	4.66747	10	9.6815	3.05487	10
									51.584	21.3395	4.6646	10	9.6815	3.05487	10
									51.651	21.3663	4.66176	10	9.6815	3.05487	10
									51.718	21.3931	4.65894	10	9.6815	3.05487	10
									51.785	21.4199	4.65614	10	9.6882	3.05322	10
									51.851	21.4467	4.65337	10	9.6949	3.05159	10
									51.918	21.4735	4.65063	10	9.7016	3.04996	10
									51.985	21.5003	4.6479	10	9.7083	3.04836	10
									52.052	21.5271	4.6452	10	9.715	3.04676	10
									52.118	21.5472	4.64496	10	9.7217	3.04518	10
									52.185	21.5673	4.64474	10	9.7351	3.0438	10
									52.252	21.5874	4.64454	10	9.7485	3.04244	10
									52.318	21.6075	4.64436	10	9.7619	3.04111	10
									52.385	21.6276	4.6442	10	9.7686	3.03958	10
									52.452	21.6477	4.64407	10	9.7753	3.03806	10
									52.519	21.6678	4.64396	10	9.782	3.03656	10
									52.585	21.6879	4.64387	10	9.7887	3.03507	10
									52.652	21.708	4.64381	10	9.7954	3.0336	10
									52.719	21.7281	4.64377	10	9.8088	3.03236	10
									52.786	21.7482	4.64375	10	9.8222	3.03114	10
									52.852	21.7683	4.64375	10	9.8356	3.02995	10
									52.919	21.7817	4.64521	10	9.849	3.02878	10
									52.986	21.7951	4.64669	10	9.8624	3.02764	10
									53.053	21.8085	4.64818	10	9.8758	3.02653	10
									53.119	21.8219	4.64969	10	9.8892	3.02544	10
									53.186	21.842	4.64875	10	9.9026	3.02438	10
									53.253	21.8621	4.64782	10	9.916	3.02334	10
									53.319	21.8822	4.64692	10	9.9294	3.02233	10
									53.386	21.9023	4.64605	10	9.9428	3.02135	10
									53.453	21.9157	4.64764	10	9.9562	3.02039	10
									53.52	21.9291	4.64924	10	9.9696	3.01946	10
									53.586	21.9425	4.65086	10	9.983	3.01856	10
									53.653	21.9559	4.6525	10	9.9964	3.01768	10
									53.72	21.9693	4.65416	10	10.0098	3.01682	10
									53.787	21.9827	4.65583	10	10.0232	3.016	10
									53.853	21.9961	4.65752	10	10.0366	3.01519	10
									53.92	22.0095	4.65922	10	10.05	3.01442	10
									53.987	22.0229	4.66094	10	10.0634	3.01367	10
									54.054	22.0363	4.66268	10	10.0768	3.01295	10
									54.12	22.0497	4.66443	10	10.0902	3.01226	10
									54.187	22.0631	4.6662	10	10.1036	3.01159	10
									54.254	22.0765	4.66799	10	10.117	3.01094	10
									54.32	22.0899	4.66979	10	10.1304	3.01033	10
									54.387	22.1033	4.67161	10	10.1438	3.00974	10
									54.454	22.11	4.67607	10	10.1572	3.00917	10
									54.521	22.1167	4.68053	10	10.1706	3.00864	10
									54.587	22.1234	4.685	10	10.184	3.00813	10
									54.654	22.1301	4.68947	10	10.1974	3.00764	10
									54.721	22.1368	4.69395	10	10.2108	3.00719	10
									54.788	22.1435	4.69843	10	10.2242	3.00675	10
									54.854	22.1569	4.70046	10	10.2376	3.00635	10
									54.921	22.177	4.70104	10	10.251	3.00597	10
									54.988	22.1971	4.70163	10	10.2644	3.00562	10
									55.055	22.2172	4.70225	10	10.2845	3.01103	10
									55.121	22.244	4.70332	10	10.3046	3.01647	10
									55.188	22.2708	4.70441	10	10.3247	3.02193	10
									55.255	22.2842	4.70938	10	10.3448	3.02742	10
									55.321	22.2976	4.71436	10	10.3649	3.03293	10
									55.388	22.311	4.71936	10	10.385	3.03847	10
									55.455	22.3244	4.72436	10	10.4051	3.04403	10
									55.522	22.3378	4.72938	10	10.4252	3.04961	10
									55.588	22.3512	4.7344	10	10.4453	3.05522	10
									55.655	22.3646	4.73944	10	10.4654	3.06085	10
									55.722	22.378	4.7445	10	10.4855	3.06651	10
									55.789	22.3914	4.74956	10	10.5056	3.07219	10
									55.855	22.4048	4.75463	10	10.5257	3.07789	10
									55.922	22.4048	4.75463	10	10.5458	3.08362	10
									55.989	22.4048	4.75463	10	10.5659	3.08937	10
									56.056	22.4048	4.75463	10	10.586	3.09515	10
									56.122	22.4048	4.75463	10	10.6061	3.10094	10
									56.189	22.4048	4.75463	10	10.6262	3.10676	10
									56.256	22.4048	4.75463	10	10.6463	3.1126	10
									56.322	22.4048	4.75463	10	10.6664	3.11847	10
									56.389	22.4048	4.75463	10	10.6865	3.12436	10
									56.456	22.4182	4.75657	10	10.7066	3.13027	10
									56.523	22.4383	4.75708	10	10.7267	3.1362	10
									56.589	22.4584	4.75761	10	10.7468	3.14215	10
									56.656	22.4785	4.75816	10	10.7669	3.14813	10
									56.723	22.4986	4.75873	10	10.787	3.15413	10
									56.79	22.5187	4.75932	10	10.8071	3.16015	10
									56.856	22.5388	4.75994	10	10.8272	3.16619	10
									56.923	22.5589	4.76058	10	10.8473	3.17225	10
									56.99	22.579	4.76123	10	10.8674	3.17834	10
									57.057	22.5991	4.76192	10	10.8875	3.18444	10
									57.123	22.6192	4.76262	10	10.9076	3.19057	10
									57.19	22.6393	4.76334	10	10.9277	3.19672	10
									57.257	22.6594	4.76409	10	10.9478	3.20289	10
									57.323	22.6795	4.76486	10	10.9746	3.20665	10
									57.39	22.6929	4.76816	10	11.0014	3.21044	10
									57.457	22.7063	4.77148	10	11.0282	3.21427	10
									57.524	22.7197	4.77482	10	11.055	3.21812	10
									57.59	22.7331	4.77817	10	11.0818	3.22201	10
									57.657	22.7465	4.78153	10	11.1086	3.22594	10
									57.724	22.7599	4.7849	10	11.1287	3.22412	10
									57.791	22.7733	4.78829	10	11.1488	3.22234	10
									57.857	22.7867	4.7917	10	11.1689	3.22059	10
									57.924	22.8068	4.79558	10	11.189	3.21887	10
									57.991	22.8269	4.79948	10	11.2024	3.21766	10
									58.058	22.847	4.80339	10	11.2158	3.21647	10
									58.124	22.8671	4.80732	10	11.2292	3.2153	10
									58.191	22.8872	4.81128	10	11.2426	3.21417	10
									58.258	22.9073	4.81525	10	11.256	3.21305	10
									58.324	22.9274	4.81924	10	11.2694	3.21196	10
									58.391	22.9475	4.82325	10	11.2828	3.2109	10
									58.458	22.9609	4.82849	10	11.2962	3.20986	10
									58.525	22.9743	4.83373	10	11.3096	3.20884	10
									58.591	22.9877	4.83899	10	11.323	3.20785	10
									58.658	23.0011	4.84427	10	11.3364	3.20688	10
									58.725	23.0145	4.84955	10	11.3498	3.20594	10
									58.792	23.0279	4.85484	10	11.3632	3.20502	10
									58.858	23.0413	4.86014	10	11.3766	3.20413	10
									58.925	23.0547	4.86545	10	11.39	3.20326	10
									58.992	23.0681	4.87078	10	11.4034	3.20241	10
									59.059	23.0815	4.87611	10	11.4168	3.20159	10
									59.125	23.0949	4.88146	10	11.4302	3.2008	10
									59.192	23.1083	4.88681	10	11.4436	3.20003	10
									59.259	23.1217	4.89218	10	11.457	3.19928	10
									59.325	23.1351	4.89755	10	11.4704	3.19856	10
									59.392	23.1485	4.90294	10	11.4838	3.19787	10
									59.459	23.1619	4.90834	10	11.4972	3.1972	10
									59.526	23.1753	4.91374	10	11.5106	3.19655	10
									59.592	23.1887	4.91916	10	11.524	3.19593	10
									59.659	23.2021	4.92459	10	11.5374	3.19533	10
									59.726	23.2155	4.93003	10	11.5508	3.19476	10
									59.793	23.2289	4.93548	10	11.5642	3.19422	10
									59.859	23.2423	4.94093	10	11.5776	3.19369	10
									59.926	23.2557	4.9464	10	11.591	3.1932	10
									59.993	23.2758	4.94934	10	11.6044	3.19273	10
									60.06	23.2959	4.9523	10	11.6178	3.19228	10
									60.126	23.316	4.95528	10	11.6312	3.19186	10
									60.193	23.3361	4.95828	10	11.6446	3.19146	10
									60.26	23.3562	4.9613	10	11.658	3.19109	10
									60.326	23.3763	4.96434	10	11.6714	3.19074	10
									60.393	23.3964	4.96739	10	11.6848	3.19042	10
									60.46	23.4165	4.97047	10	11.6982	3.19012	10
									60.527	23.4366	4.97357	10	11.7116	3.18985	10
									60.593	23.4567	4.97668	10	11.725	3.1896	10
									60.66	23.4768	4.97982	10	11.7384	3.18938	10
									60.727	23.4902	4.98221	10	11.7518	3.18918	10
									60.794	23.5036	4.98462	10	11.7652	3.18901	10
									60.86	23.517	4.98704	10	11.7786	3.18886	10
									60.927	23.5304	4.98948	10	11.792	3.18874	10
									60.994	23.5438	4.99193	10	11.8054	3.18865	10
									61.061	23.5572	4.9944	10	11.8188	3.18857	10
									61.127	23.5706	4.99688	10	11.8322	3.18853	10
									61.194	23.584	4.99937	10	11.8456	3.18851	10
									61.261	23.5974	5.00189	10	11.859	3.18851	10
									61.327	23.6108	5.00441	10	11.8724	3.18854	10
									61.394	23.6242	5.00695	10	11.8858	3.18859	10
									61.461	23.6376	5.00951	10	11.8992	3.18867	10
									61.528	23.651	5.01208	10	11.9193	3.18825	10
									61.594	23.6644	5.01466	10	11.9394	3.18786	10
									61.661	23.6778	5.01726	10	11.9595	3.18751	10
									61.728	23.6912	5.01988	10	11.9796	3.18719	10
									61.795	23.7046	5.02251	10	11.9997	3.1869	10
									61.861	23.718	5.02515	10	12.0198	3.18665	10
									61.928	23.7314	5.02781	10	12.0399	3.18643	10
									61.995	23.7448	5.03048	10	12.06	3.18624	10
									62.062	23.7582	5.03316	10	12.0801	3.18608	10
									62.128	23.7649	5.03812	10	12.1002	3.18596	10
									62.195	23.7716	5.04307	10	12.1203	3.18587	10
									62.262	23.7783	5.04803	10	12.1404	3.18581	10
									62.328	23.785	5.05299	10	12.1605	3.18579	10
									62.395	23.7917	5.05796	10	12.1806	3.1858	10
									62.462	23.7984	5.06293	10	12.2007	3.18584	10
									62.529	23.8051	5.06791	10	12.2208	3.18591	10
									62.595	23.8118	5.07289	10	12.2409	3.18602	10
									62.662	23.8185	5.07787	10	12.261	3.18616	10
									62.729	23.8252	5.08286	10	12.2811	3.18633	10
									62.796	23.8319	5.08785	10	12.3012	3.18654	10
									62.862	23.8386	5.09284	10	12.3213	3.18678	10
									62.929	23.8453	5.09784	10	12.3414	3.18705	10
									62.996	23.852	5.10284	10	12.3615	3.18736	10
									63.063	23.8587	5.10785	10	12.3816	3.18769	10
									63.129	23.8654	5.11286	10	12.4017	3.18806	10
									63.196	23.8721	5.11787	10	12.4218	3.18846	10
									63.263	23.8788	5.12289	10	12.4419	3.1889	10
									63.329	23.8855	5.12791	10	12.462	3.18937	10
									63.396	23.8922	5.13294	10	12.4821	3.18987	10
									63.463	23.8922	5.13294	10	12.5022	3.1904	10
									63.53	23.8922	5.13294	10	12.5223	3.19097	10
									63.596	23.8922	5.13294	10	12.5424	3.19157	10
									63.663	23.8922	5.13294	10	12.5558	3.19353	10
									63.73	23.8922	5.13294	10	12.5692	3.19551	10
									63.797	23.8922	5.13294	10	12.5826	3.19752	10
									63.863	23.8922	5.13294	10	12.6027	3.20502	10
									63.93	23.8922	5.13294	10	12.6228	3.21254	10
									63.997	23.8989	5.1305	10	12.6429	3.22008	10
									64.064	23.9056	5.12806	10	12.663	3.22763	10
									64.13	23.9123	5.12564	10	12.6831	3.23519	10
									64.197	23.919	5.12322	10	12.7032	3.24277	10
									64.264	23.919	5.12322	10	12.7233	3.25036	10
									64.33	23.919	5.12322	10	12.7434	3.25797	10
									64.397	23.919	5.12322	10	12.7635	3.26559	10
									64.464	23.9257	5.12081	10	12.7836	3.27323	10
									64.531	23.9324	5.11841	10	12.797	3.27542	10
									64.597	23.9391	5.11601	10	12.8104	3.27765	10
									64.664	23.9458	5.11362	10	12.8238	3.27989	10
									64.731	23.9525	5.11124	10	12.8372	3.28215	10
									64.798	23.9592	5.10887	10	12.8506	3.28444	10
									64.864	23.9659	5.10651	10	12.864	3.28675	10
									64.931	23.9726	5.10415	10	12.8774	3.28908	10
									64.998	23.9793	5.1018	10	12.8908	3.29144	10
									65.065	23.986	5.09946	10	12.9042	3.29382	10
									65.131	23.9927	5.09713	10	12.9176	3.29622	10
									65.198	23.9994	5.0948	10	12.931	3.29864	10
									65.265	24.0061	5.09985	10	12.9444	3.30109	10
									65.331	24.0195	5.10409	10	12.9578	3.30355	10
									65.398	24.0329	5.10833	10	12.9712	3.30605	10
									65.465	24.0463	5.11259	10	12.9913	3.30769	10
									65.532	24.0597	5.11686	10	13.0114	3.30937	10
									65.598	24.0731	5.12115	10	13.0315	3.31108	10
									65.665	24.0865	5.12544	10	13.0516	3.31282	10
									65.732	24.0999	5.12975	10	13.0717	3.31459	10
									65.799	24.1133	5.13407	10	13.0918	3.31639	10
									65.865	24.1267	5.1384	10	13.1119	3.31823	10
									65.932	24.1401	5.14274	10	13.132	3.32009	10
									65.999	24.1535	5.1471	10	13.1521	3.32198	10
									66.066	24.1669	5.15146	10	13.1722	3.3239	10
									66.132	24.1803	5.15584	10	13.1923	3.32586	10
									66.199	24.1937	5.16023	10	13.2124	3.32784	10
									66.266	24.2071	5.16463	10	13.2325	3.32986	10
									66.332	24.2205	5.16905	10	13.2526	3.3319	10
									66.399	24.2339	5.17347	10	13.2727	3.33398	10
									66.466	24.2473	5.17791	10	13.2928	3.33608	10
									66.533	24.2607	5.18236	10	13.3129	3.33822	10
									66.599	24.2741	5.18682	10	13.333	3.34038	10
									66.666	24.2875	5.19129	10	13.3531	3.34258	10
									66.733	24.3009	5.19577	10	13.3665	3.34446	10
									66.8	24.3143	5.20027	10	13.3799	3.34637	10
									66.866	24.3277	5.20477	10	13.3933	3.34829	10
									66.933	24.3411	5.20929	10	13.4067	3.35025	10
									67	24.3545	5.21382	10	13.4201	3.35222	10
									67.067	24.3679	5.21836	10	13.4335	3.35421	10
									67.133	24.3813	5.22291	10	13.4469	3.35623	10
									67.2	24.3947	5.22747	10	13.4603	3.35827	10
									67.267	24.4081	5.23205	10	13.4603	3.35827	10
									67.334	24.4282	5.23728	10	13.4603	3.35827	10
									67.4	24.4483	5.24253	10	13.4603	3.35827	10
									67.467	24.4684	5.24779	10	13.4603	3.35827	10
									67.534	24.4818	5.2524	10	13.4603	3.35827	10
									67.6	24.4952	5.25702	10	13.4603	3.35827	10
									67.667	24.5086	5.26166	10	13.4603	3.35827	10
									67.734	24.5287	5.26696	10	13.4603	3.35827	10
									67.801	24.5488	5.27228	10	13.4603	3.35827	10
									67.867	24.5689	5.27761	10	13.4603	3.35827	10
									67.934	24.589	5.28296	10	13.4603	3.35827	10
									68.001	24.6091	5.28831	10	13.4603	3.35827	10
									68.068	24.6292	5.29369	10	13.4603	3.35827	10
									68.134	24.6493	5.29908	10	13.4603	3.35827	10
									68.201	24.6694	5.30448	10	13.4603	3.35827	10
									68.268	24.6895	5.3099	10	13.4603	3.35827	10
									68.335	24.7096	5.31533	10	13.4603	3.35827	10
									68.401	24.7297	5.32078	10	13.4603	3.35827	10
									68.468	24.7498	5.32624	10	13.4603	3.35827	10
									68.535	24.7632	5.32653	10	13.4603	3.35827	10
									68.601	24.7766	5.32683	10	13.4603	3.35827	10
									68.668	24.79	5.32715	10	13.4603	3.35827	10
									68.735	24.8034	5.32749	10	13.4603	3.35827	10
									68.802	24.8235	5.32529	10	13.4603	3.35827	10
									68.868	24.8436	5.32311	10	13.4603	3.35827	10
									68.935	24.8637	5.32095	10	13.4603	3.35827	10
									69.002	24.8838	5.31881	10	13.4603	3.35827	10
									69.069	24.9039	5.31669	10	13.4603	3.35827	10
									69.135	24.924	5.31459	10	13.4603	3.35827	10
									69.202	24.9441	5.31251	10	13.4603	3.35827	10
									69.269	24.9642	5.31044	10	13.4603	3.35827	10
									69.336	24.9843	5.3084	10	13.4603	3.35827	10
									69.402	25.0044	5.30637	10	13.4603	3.35827	10
									69.469	25.0245	5.30436	10	13.4603	3.35827	10
									69.536	25.0446	5.30237	10	13.4603	3.35827	10
									69.602	25.0647	5.30041	10	13.4603	3.35827	10
									69.669	25.0848	5.29845	10	13.4603	3.35827	10
									69.736	25.1049	5.29652	10	13.4603	3.35827	10
									69.803	25.125	5.29461	10	13.4603	3.35827	10
									69.869	25.1451	5.29272	10	13.4603	3.35827	10
									69.936	25.1652	5.29084	10	13.4603	3.35827	10
									70.003	25.1853	5.28899	10	13.4603	3.35827	10
									70.07	25.2054	5.28715	10	13.4603	3.35827	10
									70.136	25.2188	5.28562	10	13.4603	3.35827	10
									70.203	25.2322	5.2841	10	13.4603	3.35827	10
									70.27	25.2456	5.28259	10	13.4603	3.35827	10
									70.337	25.259	5.2811	10	13.4603	3.35827	10
									70.403	25.2724	5.27963	10	13.467	3.35586	10
									70.47	25.2858	5.27817	10	13.4737	3.35346	10
									70.537	25.2992	5.27672	10	13.4804	3.35107	10
									70.603	25.3126	5.27529	10	13.4871	3.34869	10
									70.67	25.326	5.27387	10	13.4938	3.34632	10
									70.737	25.3394	5.27247	10	13.5005	3.34397	10
									70.804	25.3528	5.27109	10	13.5072	3.34163	10
									70.87	25.3662	5.26971	10	13.5206	3.34017	10
									70.937	25.3796	5.26835	10	13.534	3.33874	10
									71.004	25.3997	5.27217	10	13.5474	3.33733	10
									71.071	25.4265	5.27355	10	13.5608	3.33595	10
									71.137	25.4533	5.27496	10	13.5742	3.33459	10
									71.204	25.4801	5.2764	10	13.5876	3.33325	10
									71.271	25.5069	5.27785	10	13.601	3.33194	10
									71.338	25.5337	5.27933	10	13.6144	3.33065	10
									71.404	25.5605	5.28083	10	13.6278	3.32938	10
									71.471	25.5873	5.28235	10	13.6412	3.32813	10
									71.538	25.6141	5.2839	10	13.6546	3.32691	10
									71.604	25.6409	5.28547	10	13.668	3.32572	10
									71.671	25.6677	5.28705	10	13.6814	3.32455	10
									71.738	25.6945	5.28867	10	13.6948	3.3234	10
									71.805	25.7213	5.2903	10	13.7082	3.32227	10
									71.871	25.7481	5.29195	10	13.7216	3.32117	10
									71.938	25.7749	5.29363	10	13.7417	3.31855	10
									72.005	25.8017	5.29533	10	13.7618	3.31596	10
									72.072	25.8285	5.29705	10	13.7886	3.31857	10
									72.138	25.8553	5.2988	10	13.8154	3.32121	10
									72.205	25.8821	5.30056	10	13.8422	3.32389	10
									72.272	25.9089	5.30235	10	13.869	3.3266	10
									72.339	25.929	5.30648	10	13.8958	3.32935	10
									72.405	25.9491	5.31062	10	13.9226	3.33213	10
									72.472	25.9692	5.31478	10	13.9427	3.32974	10
									72.539	25.9893	5.31896	10	13.9561	3.32884	10
									72.605	26.0094	5.32315	10	13.9695	3.32796	10
									72.672	26.0295	5.32736	10	13.9829	3.3271	10
									72.739	26.0496	5.33159	10	13.9896	3.32507	10
									72.806	26.0697	5.33583	10	13.9963	3.32305	10
									72.872	26.0898	5.34009	10	13.9963	3.32305	10
									72.939	26.1099	5.34436	10	13.9963	3.32305	10
									73.006	26.13	5.34865	10	13.9963	3.32305	10
									73.073	26.1501	5.35296	10	13.9963	3.32305	10
									73.139	26.1702	5.35728	10	13.9963	3.32305	10
									73.206	26.1836	5.35636	10	13.9963	3.32305	10
									73.273	26.197	5.35545	10	13.9963	3.32305	10
									73.34	26.2104	5.35455	10	13.9963	3.32305	10
									73.406	26.2238	5.35367	10	13.9963	3.32305	10
									73.473	26.2372	5.3528	10	14.003	3.32425	10
									73.54	26.2506	5.35195	10	14.0097	3.32545	10
									73.606	26.264	5.35112	10	14.0164	3.32667	10
									73.673	26.2774	5.35029	10	14.0231	3.32791	10
									73.74	26.2908	5.34949	10	14.0298	3.32915	10
									73.807	26.3042	5.34869	10	14.0365	3.33041	10
									73.873	26.3176	5.34792	10	14.0432	3.33168	10
									73.94	26.331	5.34715	10	14.0499	3.33297	10
									74.007	26.3444	5.3464	10	14.0499	3.33297	10
									74.074	26.3578	5.34567	10	14.0566	3.3315	10
									74.14	26.3712	5.34495	10	14.0633	3.33004	10
									74.207	26.3846	5.34425	10	14.07	3.3286	10
									74.274	26.398	5.34356	10	14.07	3.3286	10
									74.341	26.4114	5.34289	10	14.07	3.3286	10
									74.407	26.4181	5.3442	10	14.07	3.3286	10
									74.474	26.4248	5.34553	10	14.0767	3.33377	10
									74.541	26.4315	5.34687	10	14.0834	3.33895	10
									74.607	26.4382	5.34821	10	14.0901	3.34413	10
									74.674	26.4382	5.34821	10	14.0968	3.34932	10
									74.741	26.4382	5.34821	10	14.1035	3.35451	10
									74.808	26.4382	5.34821	10	14.1102	3.35971	10
									74.874	26.4382	5.34821	10	14.1169	3.36492	10
									74.941	26.4382	5.34821	10	14.1236	3.36291	10
									75.008	26.4382	5.34821	10	14.1303	3.36092	10
									75.075	26.4382	5.34821	10	14.137	3.35894	10
									75.141	26.4382	5.34821	10	14.1437	3.35697	10
									75.208	26.4382	5.34821	10	14.1504	3.35501	10
									75.275	26.4382	5.34821	10	14.1571	3.35307	10
									75.342	26.4382	5.34821	10	14.1638	3.35113	10
									75.408	26.4382	5.34821	10	14.1705	3.34922	10
									75.475	26.4382	5.34821	10	14.1772	3.34731	10
									75.542	26.4382	5.34821	10	14.1839	3.34541	10
									75.608	26.4382	5.34821	10	14.1839	3.34541	10
									75.675	26.4382	5.34821	10	14.1839	3.34541	10
									75.742	26.4382	5.34821	10	14.1839	3.34541	10
									75.809	26.4382	5.34821	10	14.1839	3.34541	10
									75.875	26.4382	5.34821	10	14.1839	3.34541	10
									75.942	26.4382	5.34821	10	14.1839	3.34541	10
									76.009	26.4382	5.34821	10	14.1839	3.34541	10
									76.076	26.4382	5.34821	10	14.1839	3.34541	10
									76.142	26.4449	5.34663	10	14.1839	3.34541	10
									76.209	26.4516	5.34506	10	14.1839	3.34541	10
									76.276	26.4583	5.3435	10	14.1839	3.34541	10
									76.343	26.465	5.34194	10	14.1906	3.35064	10
									76.409	26.4717	5.3404	10	14.1973	3.35587	10
									76.476	26.4784	5.33886	10	14.204	3.3611	10
									76.543	26.4851	5.33733	10	14.2107	3.36634	10
									76.609	26.4918	5.33581	10	14.2174	3.37159	10
									76.676	26.4985	5.3343	10	14.2174	3.37159	10
									76.743	26.5052	5.33279	10	14.2174	3.37159	10
									76.81	26.5119	5.33129	10	14.2174	3.37159	10
									76.876	26.5186	5.3298	10	14.2174	3.37159	10
									76.943	26.5253	5.32832	10	14.2174	3.37159	10
									77.01	26.532	5.32684	10	14.2174	3.37159	10
									77.077	26.5387	5.32538	10	14.2174	3.37159	10
									77.143	26.5454	5.32392	10	14.2174	3.37159	10
									77.21	26.5521	5.32247	10	14.2174	3.37159	10
									77.277	26.5588	5.32103	10	14.2174	3.37159	10
									77.344	26.5655	5.31959	10	14.2174	3.37159	10
									77.41	26.5722	5.31817	10	14.2174	3.37159	10
									77.477	26.5789	5.31675	10	14.2174	3.37159	10
									77.544	26.5856	5.31534	10	14.2174	3.37159	10
									77.61	26.5923	5.31394	10	14.2174	3.37159	10
									77.677	26.599	5.31255	10	14.2174	3.37159	10
									77.744	26.6057	5.31116	10	14.2174	3.37159	10
									77.811	26.6124	5.30978	10	14.2174	3.37159	10
									77.877	26.6191	5.30841	10	14.2174	3.37159	10
									77.944	26.6258	5.30705	10	14.2174	3.37159	10
									78.011	26.6325	5.3057	10	14.2174	3.37159	10
									78.078	26.6325	5.3057	10	14.2174	3.37159	10
									78.144	26.6325	5.3057	10	14.2174	3.37159	10
									78.211	26.6325	5.3057	10	14.2174	3.37159	10
									78.278	26.6325	5.3057	10	14.2174	3.37159	10
									78.345	26.6325	5.3057	10	14.2174	3.37159	10
									78.411	26.6325	5.3057	10	14.2174	3.37159	10
									78.478	26.6392	5.30683	10	14.2174	3.37159	10
									78.545	26.6459	5.30796	10	14.2174	3.37159	10
									78.611	26.6526	5.30911	10	14.2174	3.37159	10
									78.678	26.6593	5.31026	10	14.2174	3.37159	10
									78.745	26.666	5.31142	10	14.2174	3.37159	10
									78.812	26.6727	5.31259	10	14.2174	3.37159	10
									78.878	26.6794	5.31376	10	14.2174	3.37159	10
									78.945	26.6861	5.31495	10	14.2241	3.37004	10
									79.012	26.6928	5.31614	10	14.2308	3.3685	10
									79.079	26.6995	5.31734	10	14.2375	3.36698	10
									79.145	26.7062	5.31855	10	14.2442	3.36547	10
									79.212	26.7129	5.31977	10	14.2509	3.36397	10
									79.279	26.7196	5.321	10	14.2576	3.36248	10
									79.346	26.7263	5.32223	10	14.2643	3.36101	10
									79.412	26.733	5.32347	10	14.271	3.35954	10
									79.479	26.7397	5.32472	10	14.2777	3.3581	10
									79.546	26.7464	5.32598	10	14.2844	3.35666	10
									79.612	26.7531	5.32725	10	14.2911	3.35524	10
									79.679	26.7598	5.32852	10	14.2978	3.35383	10
									79.746	26.7665	5.3298	10	14.3045	3.35243	10
									79.813	26.7732	5.3311	10	14.3112	3.35105	10
									79.879	26.7866	5.32985	10	14.3179	3.34967	10
									79.946	26.8	5.32861	10	14.3246	3.34831	10
									80.013	26.8134	5.3274	10	14.3313	3.34697	10
									80.08	26.8268	5.32619	10	14.338	3.34564	10
									80.146	26.8402	5.325	10	14.3447	3.34431	10
									80.213	26.8536	5.32383	10	14.3514	3.34301	10
									80.28	26.867	5.32267	10	14.3581	3.34171	10
									80.347	26.8804	5.32152	10	14.3648	3.34043	10
									80.413	26.8938	5.32039	10	14.3715	3.33916	10
									80.48	26.9072	5.31928	10	14.3782	3.33791	10
									80.547	26.9273	5.31766	10	14.3849	3.33666	10
									80.613	26.9474	5.31605	10	14.3916	3.33543	10
									80.68	26.9675	5.31447	10	14.3983	3.33422	10
									80.747	26.9876	5.31291	10	14.405	3.33301	10
									80.814	27.0077	5.31137	10	14.4117	3.33182	10
									80.88	27.0278	5.30984	10	14.4184	3.33065	10
									80.947	27.0479	5.30834	10	14.4251	3.32948	10
									81.014	27.068	5.30685	10	14.4318	3.32833	10
									81.081	27.0881	5.30539	10	14.4385	3.32719	10
									81.147	27.1015	5.3025	10	14.4452	3.32606	10
									81.214	27.1149	5.29963	10	14.4519	3.32495	10
									81.281	27.1283	5.29677	10	14.4586	3.32385	10
									81.348	27.1417	5.29393	10	14.4653	3.32277	10
									81.414	27.1551	5.2911	10	14.472	3.3217	10
									81.481	27.1685	5.28828	10	14.4787	3.32064	10
									81.548	27.1819	5.28547	10	14.4854	3.31959	10
									81.614	27.1953	5.28268	10	14.4921	3.31856	10
									81.681	27.2087	5.27991	10	14.4988	3.31754	10
									81.748	27.2288	5.27857	10	14.5055	3.31653	10
									81.815	27.2489	5.27726	10	14.5122	3.31554	10
									81.881	27.269	5.27596	10	14.5189	3.31456	10
									81.948	27.2891	5.27469	10	14.5256	3.31359	10
									82.015	27.3092	5.27343	10	14.5323	3.31264	10
									82.082	27.3293	5.27219	10	14.539	3.31169	10
									82.148	27.3494	5.27098	10	14.5457	3.31077	10
									82.215	27.3695	5.26978	10	14.5524	3.30985	10
									82.282	27.3896	5.2686	10	14.5591	3.30895	10
									82.349	27.4097	5.26744	10	14.5658	3.30807	10
									82.415	27.4298	5.2663	10	14.5725	3.30719	10
									82.482	27.4499	5.26518	10	14.5792	3.30633	10
									82.549	27.47	5.26409	10	14.5859	3.30549	10
									82.615	27.4901	5.26301	10	14.5926	3.30465	10
									82.682	27.5102	5.26195	10	14.5993	3.30383	10
									82.749	27.5303	5.26091	10	14.606	3.30302	10
									82.816	27.5504	5.25988	10	14.6127	3.30223	10
									82.882	27.5705	5.25888	10	14.6194	3.30145	10
									82.949	27.5906	5.2579	10	14.6261	3.30068	10
									83.016	27.6107	5.25694	10	14.6328	3.29993	10
									83.083	27.6308	5.256	10	14.6395	3.29919	10
									83.149	27.6509	5.25508	10	14.6462	3.29846	10
									83.216	27.671	5.25418	10	14.6529	3.29775	10
									83.283	27.6911	5.25329	10	14.6596	3.29705	10
									83.35	27.7045	5.25465	10	14.6596	3.29705	10
									83.416	27.7179	5.25603	10	14.6596	3.29705	10
									83.483	27.7313	5.25741	10	14.6596	3.29705	10
									83.55	27.7447	5.25882	10	14.6596	3.29705	10
									83.616	27.7581	5.26024	10	14.6596	3.29705	10
									83.683	27.7715	5.26167	10	14.6596	3.29705	10
									83.75	27.7849	5.26312	10	14.6596	3.29705	10
									83.817	27.7983	5.26458	10	14.6596	3.29705	10
									83.883	27.8117	5.26606	10	14.6596	3.29705	10
									83.95	27.8251	5.26755	10	14.6596	3.29705	10
									84.017	27.8385	5.26906	10	14.6596	3.29705	10
									84.084	27.8586	5.27175	10	14.6596	3.29705	10
									84.15	27.8787	5.27446	10	14.6596	3.29705	10
									84.217	27.8988	5.27719	10	14.6596	3.29705	10
									84.284	27.9189	5.27994	10	14.6596	3.29705	10
									84.351	27.939	5.28271	10	14.6596	3.29705	10
									84.417	27.9524	5.28429	10	14.6596	3.29705	10
									84.484	27.9658	5.28589	10	14.6596	3.29705	10
									84.551	27.9792	5.28751	10	14.6596	3.29705	10
									84.617	27.9926	5.28913	10	14.6596	3.29705	10
									84.684	28.006	5.29078	10	14.6596	3.29705	10
									84.751	28.0194	5.29243	10	14.6596	3.29705	10
									84.818	28.0328	5.2941	10	14.6596	3.29705	10
									84.884	28.0462	5.29579	10	14.6663	3.29636	10
									84.951	28.0596	5.29749	10	14.673	3.29569	10
									85.018	28.073	5.29921	10	14.6797	3.29503	10
									85.085	28.0864	5.30094	10	14.6864	3.29439	10
									85.151	28.0998	5.30268	10	14.6931	3.29375	10
									85.218	28.1132	5.30444	10	14.6998	3.29314	10
									85.285	28.1266	5.30621	10	14.7065	3.29253	10
									85.352	28.14	5.308	10	14.7132	3.29194	10
									85.418	28.1534	5.3098	10	14.7199	3.29136	10
									85.485	28.1668	5.31162	10	14.7266	3.2908	10
									85.552	28.1802	5.31345	10	14.7266	3.2908	10
									85.618	28.1936	5.31529	10	14.7266	3.2908	10
									85.685	28.207	5.31715	10	14.7266	3.2908	10
									85.752	28.2204	5.31903	10	14.7266	3.2908	10
									85.819	28.2338	5.32092	10	14.7266	3.2908	10
									85.885	28.2472	5.32282	10	14.7266	3.2908	10
									85.952	28.2606	5.32474	10	14.7266	3.2908	10
									86.019	28.274	5.32667	10	14.7266	3.2908	10
									86.086	28.2874	5.32861	10	14.7266	3.2908	10
									86.152	28.3008	5.33057	10	14.7266	3.2908	10
									86.219	28.3276	5.32994	10	14.7266	3.2908	10
									86.286	28.3544	5.32933	10	14.7266	3.2908	10
									86.353	28.3812	5.32875	10	14.7266	3.2908	10
									86.419	28.408	5.32818	10	14.7266	3.2908	10
									86.486	28.4348	5.32764	10	14.7266	3.2908	10
									86.553	28.4683	5.32485	10	14.7266	3.2908	10
									86.619	28.5018	5.32209	10	14.7266	3.2908	10
									86.686	28.5353	5.31934	10	14.7266	3.2908	10
									86.753	28.5688	5.31662	10	14.7266	3.2908	10
									86.82	28.6023	5.31392	10	14.7266	3.2908	10
									86.886	28.6291	5.31116	10	14.7266	3.2908	10
									86.953	28.6559	5.30841	10	14.7266	3.2908	10
									87.02	28.6827	5.30569	10	14.7266	3.2908	10
									87.087	28.7095	5.30299	10	14.7266	3.2908	10
									87.153	28.7363	5.30031	10	14.7266	3.2908	10
									87.22	28.7631	5.29765	10	14.7266	3.2908	10
									87.287	28.7899	5.29502	10	14.7266	3.2908	10
									87.354	28.8167	5.2924	10	14.7266	3.2908	10
									87.42	28.8435	5.28981	10	14.7266	3.2908	10
									87.487	28.8703	5.28723	10	14.7266	3.2908	10
									87.554	28.8971	5.28468	10	14.7266	3.2908	10
									87.62	28.9239	5.28215	10	14.7266	3.2908	10
									87.687	28.9507	5.27964	10	14.7266	3.2908	10
									87.754	28.9775	5.27716	10	14.7266	3.2908	10
									87.821	29.0043	5.27469	10	14.7266	3.2908	10
									87.887	29.0311	5.27225	10	14.7266	3.2908	10
									87.954	29.0579	5.26982	10	14.7266	3.2908	10
									88.021	29.0847	5.26742	10	14.7266	3.2908	10
									88.088	29.1115	5.26504	10	14.7266	3.2908	10
									88.154	29.1383	5.26269	10	14.7266	3.2908	10
									88.221	29.1718	5.25864	10	14.7266	3.2908	10
									88.288	29.2053	5.25461	10	14.7266	3.2908	10
									88.355	29.2388	5.2506	10	14.7266	3.2908	10
									88.421	29.2723	5.24661	10	14.7266	3.2908	10
									88.488	29.3058	5.24264	10	14.7266	3.2908	10
									88.555	29.3326	5.24039	10	14.7266	3.2908	10
									88.621	29.3661	5.23646	10	14.7266	3.2908	10
									88.688	29.3996	5.23255	10	14.7266	3.2908	10
									88.755	29.4331	5.22866	10	14.7266	3.2908	10
									88.822	29.4666	5.2248	10	14.7266	3.2908	10
									88.888	29.5001	5.22095	10	14.7266	3.2908	10
									88.955	29.5336	5.21712	10	14.7266	3.2908	10
									89.022	29.5671	5.21332	10	14.7266	3.2908	10
									89.089	29.6006	5.20954	10	14.7266	3.2908	10
									89.155	29.6341	5.20578	10	14.7266	3.2908	10
									89.222	29.6676	5.20204	10	14.7266	3.2908	10
									89.289	29.7011	5.19832	10	14.7266	3.2908	10
									89.356	29.7279	5.19628	10	14.7266	3.2908	10
									89.422	29.7547	5.19427	10	14.7266	3.2908	10
									89.489	29.7815	5.18841	10	14.7266	3.2908	10
									89.556	29.8083	5.18256	10	14.7333	3.29196	10
									89.622	29.8351	5.17673	10	14.74	3.29313	10
									89.689	29.8619	5.17092	10	14.7467	3.29432	10
									89.756	29.8887	5.16512	10	14.7534	3.29552	10
									89.823	29.9155	5.15934	10	14.7601	3.29674	10
									89.889	29.9423	5.15358	10	14.7668	3.29796	10
									89.956	29.9691	5.14783	10	14.7735	3.29921	10
									90.023	29.9959	5.1421	10	14.7802	3.30046	10
									90.09	30.0227	5.13639	10	14.7869	3.30173	10
									90.156	30.0495	5.13069	10	14.7936	3.30301	10
									90.223	30.0696	5.12664	10	14.8003	3.3043	10
									90.29	30.0897	5.12261	10	14.807	3.3056	10
									90.357	30.1098	5.1186	10	14.8137	3.30692	10
									90.423	30.1299	5.1146	10	14.8204	3.30826	10
									90.49	30.15	5.11062	10	14.8338	3.30962	10
									90.557	30.1701	5.10665	10	14.8472	3.31101	10
									90.623	30.1902	5.10271	10	14.8606	3.31242	10
									90.69	30.2103	5.09878	10	14.874	3.31385	10
									90.757	30.2304	5.09487	10	14.8874	3.3153	10
									90.824	30.2505	5.09097	10	14.9008	3.31678	10
									90.89	30.2706	5.0871	10	14.9142	3.31829	10
									90.957	30.2907	5.08324	10	14.9276	3.31982	10
									91.024	30.3108	5.0794	10	14.9343	3.32125	10
									91.091	30.3309	5.07558	10	14.9343	3.32125	10
									91.157	30.3443	5.07412	10	14.9343	3.32125	10
									91.224	30.3577	5.07267	10	14.9343	3.32125	10
									91.291	30.3711	5.07124	10	14.9343	3.32125	10
									91.358	30.3845	5.06983	10	14.9343	3.32125	10
									91.424	30.3979	5.06843	10	14.9343	3.32125	10
									91.491	30.4113	5.06704	10	14.9343	3.32125	10
									91.558	30.4314	5.06398	10	14.9343	3.32125	10
									91.624	30.4515	5.06093	10	14.9343	3.32125	10
									91.691	30.4716	5.05789	10	14.9343	3.32125	10
									91.758	30.4917	5.05488	10	14.9343	3.32125	10
									91.825	30.5118	5.05189	10	14.9343	3.32125	10
									91.891	30.5319	5.04892	10	14.9343	3.32125	10
									91.958	30.552	5.04596	10	14.9343	3.32125	10
									92.025	30.5721	5.04302	10	14.9343	3.32125	10
									92.092	30.5922	5.04011	10	14.9343	3.32125	10
									92.158	30.6123	5.03721	10	14.9343	3.32125	10
									92.225	30.6324	5.03433	10	14.9343	3.32125	10
									92.292	30.6458	5.03334	10	14.9343	3.32125	10
									92.359	30.6592	5.03237	10	14.9343	3.32125	10
									92.425	30.6726	5.03142	10	14.9343	3.32125	10
									92.492	30.686	5.03048	10	14.9343	3.32125	10
									92.559	30.6994	5.02955	10	14.9343	3.32125	10
									92.625	30.7128	5.02864	10	14.9343	3.32125	10
									92.692	30.7262	5.02775	10	14.9343	3.32125	10
									92.759	30.7396	5.02687	10	14.9343	3.32125	10
									92.826	30.753	5.02601	10	14.9343	3.32125	10
									92.892	30.7664	5.02517	10	14.9343	3.32125	10
									92.959	30.7798	5.02434	10	14.9343	3.32125	10
									93.026	30.7932	5.02352	10	14.9343	3.32125	10
									93.093	30.8066	5.02272	10	14.9343	3.32125	10
									93.159	30.82	5.02194	10	14.9343	3.32125	10
									93.226	30.8334	5.02118	10	14.9343	3.32125	10
									93.293	30.8468	5.02042	10	14.9343	3.32125	10
									93.36	30.8602	5.01969	10	14.9343	3.32125	10
									93.426	30.8736	5.01897	10	14.9343	3.32125	10
									93.493	30.887	5.01827	10	14.9343	3.32125	10
									93.56	30.9004	5.01758	10	14.9343	3.32125	10
									93.626	30.9138	5.01691	10	14.9343	3.32125	10
									93.693	30.9272	5.01625	10	14.9343	3.32125	10
									93.76	30.9406	5.01561	10	14.9343	3.32125	10
									93.827	30.9607	5.01581	10	14.9343	3.32125	10
									93.893	30.9808	5.01602	10	14.9343	3.32125	10
									93.96	31.0009	5.01626	10	14.9343	3.32125	10
									94.027	31.021	5.01652	10	14.9343	3.32125	10
									94.094	31.0411	5.0168	10	14.9343	3.32125	10
									94.16	31.0612	5.0171	10	14.9343	3.32125	10
									94.227	31.0813	5.01741	10	14.9343	3.32125	10
									94.294	31.1014	5.01776	10	14.941	3.32357	10
									94.361	31.1215	5.01812	10	14.9477	3.3259	10
									94.427	31.1416	5.0185	10	14.9544	3.32825	10
									94.494	31.1617	5.01891	10	14.9611	3.3306	10
									94.561	31.1818	5.01933	10	14.9678	3.33297	10
									94.627	31.2019	5.01978	10	14.9812	3.34049	10
									94.694	31.222	5.02024	10	14.9946	3.34802	10
									94.761	31.2421	5.02073	10	15.008	3.35555	10
									94.828	31.2622	5.02124	10	15.0214	3.36309	10
									94.894	31.2823	5.02177	10	15.0348	3.37064	10
									94.961	31.3024	5.02232	10	15.0482	3.37819	10
									95.028	31.3158	5.02193	10	15.0616	3.38575	10
									95.095	31.3292	5.02157	10	15.075	3.39331	10
									95.161	31.3426	5.02121	10	15.0884	3.40089	10
									95.228	31.356	5.02088	10	15.1018	3.40847	10
									95.295	31.3694	5.02056	10	15.1152	3.41605	10
									95.362	31.3828	5.02025	10	15.1286	3.42365	10
									95.428	31.3962	5.01997	10	15.142	3.43125	10
									95.495	31.4096	5.01969	10	15.1554	3.43885	10
									95.562	31.423	5.01944	10	15.1688	3.44646	10
									95.628	31.4364	5.0192	10	15.1822	3.45408	10
									95.695	31.4498	5.01897	10	15.1956	3.46171	10
									95.762	31.4632	5.01877	10	15.209	3.46934	10
									95.829	31.4766	5.01857	10	15.2224	3.47697	10
									95.895	31.49	5.01839	10	15.2358	3.48462	10
									95.962	31.5034	5.01823	10	15.2492	3.49227	10
									96.029	31.5168	5.01809	10	15.2626	3.49992	10
									96.096	31.5302	5.01796	10	15.276	3.50759	10
									96.162	31.5436	5.01785	10	15.2827	3.51011	10
									96.229	31.5503	5.01666	10	15.2894	3.51264	10
									96.296	31.557	5.01548	10	15.2961	3.51518	10
									96.363	31.5637	5.01431	10	15.3095	3.52287	10
									96.429	31.5771	5.0106	10	15.3229	3.53056	10
									96.496	31.5905	5.0069	10	15.3363	3.53826	10
									96.563	31.6039	5.00321	10	15.3497	3.54596	10
									96.629	31.624	5.00044	10	15.3698	3.55493	10
									96.696	31.6441	4.9977	10	15.3899	3.56391	10
									96.763	31.6642	4.99498	10	15.41	3.5729	10
									96.83	31.6843	4.99227	10	15.4301	3.58189	10
									96.896	31.7044	4.98959	10	15.4502	3.59089	10
									96.963	31.7245	4.98692	10	15.4703	3.5999	10
									97.03	31.7446	4.98428	10	15.4904	3.60892	10
									97.097	31.7647	4.98165	10	15.5105	3.61794	10
									97.163	31.7848	4.97904	10	15.5239	3.62564	10
									97.23	31.8049	4.97646	10	15.5306	3.62825	10
									97.297	31.825	4.97389	10	15.5373	3.63087	10
									97.364	31.8451	4.97134	10	15.544	3.6335	10
									97.43	31.8652	4.96882	10	15.5507	3.63614	10
									97.497	31.8853	4.96631	10	15.5574	3.6388	10
									97.564	31.9054	4.96382	10	15.5641	3.64146	10
									97.63	31.9255	4.96135	10	15.5708	3.64413	10
									97.697	31.9456	4.9589	10	15.5775	3.64681	10
									97.764	31.9657	4.95648	10	15.5842	3.6495	10
									97.831	31.9858	4.95407	10	15.5909	3.65221	10
									97.897	32.0059	4.95168	10	15.5976	3.65492	10
									97.964	32.026	4.94931	10	15.6043	3.65764	10
									98.031	32.0461	4.94696	10	15.611	3.66038	10
									98.098	32.0662	4.94463	10	15.6177	3.66312	10
									98.164	32.0863	4.94233	10	15.6244	3.66588	10
									98.231	32.1064	4.94004	10	15.6311	3.66864	10
									98.298	32.1265	4.93777	10	15.6378	3.67142	10
									98.365	32.1466	4.93552	10	15.6445	3.6742	10
									98.431	32.1667	4.9333	10	15.6512	3.67699	10
									98.498	32.1868	4.93109	10	15.6579	3.6798	10
									98.565	32.2069	4.9289	10	15.6646	3.68261	10
									98.631	32.227	4.92673	10	15.6713	3.68544	10
									98.698	32.2471	4.92459	10	15.678	3.68827	10
									98.765	32.2672	4.92246	10	15.6847	3.69112	10
									98.832	32.2873	4.92036	10	15.6914	3.69397	10
									98.898	32.3074	4.91827	10	15.6981	3.69684	10
									98.965	32.3275	4.91621	10	15.7048	3.69971	10
									99.032	32.3476	4.91416	10	15.7115	3.7026	10
									99.099	32.3677	4.91214	10	15.7182	3.70549	10
									99.165	32.3878	4.91014	10	15.7182	3.70549	10
									99.232	32.4079	4.90815	10	15.7182	3.70549	10
									99.299	32.428	4.90619	10	15.7182	3.70549	10
									99.366	32.4481	4.90425	10	15.7182	3.70549	10
									99.432	32.4682	4.90233	10	15.7182	3.70549	10
									99.499	32.4883	4.90043	10	15.7182	3.70549	10
									99.566	32.5084	4.89855	10	15.7182	3.70549	10
									99.632	32.5285	4.89669	10	15.7182	3.70549	10
									99.699	32.5486	4.89485	10	15.7182	3.70549	10
									99.766	32.5687	4.89303	10	15.7182	3.70549	10
									99.833	32.5888	4.89124	10	15.7182	3.70549	10
									99.899	32.6089	4.88946	10	15.7182	3.70549	10
									99.966	32.629	4.88771	10	15.7182	3.70549	10
									100.033	32.6491	4.88597	10	15.7182	3.70549	10
									100.1	32.6692	4.88426	10	15.7182	3.70549	10
									100.166	32.6893	4.88256	10	15.7182	3.70549	10
									100.233	32.7094	4.88089	10	15.7182	3.70549	10
									100.3	32.7295	4.87924	10	15.7182	3.70549	10
									100.367	32.7496	4.87761	10	15.7182	3.70549	10
									100.433	32.7697	4.876	10	15.7182	3.70549	10
									100.5	32.7898	4.87441	10	15.7182	3.70549	10
									100.567	32.8099	4.87284	10	15.7182	3.70549	10
									100.633	32.83	4.8713	10	15.7182	3.70549	10
									100.7	32.8501	4.86977	10	15.7182	3.70549	10
									100.767	32.8702	4.86827	10	15.7182	3.70549	10
									100.834	32.8903	4.86679	10	15.7182	3.70549	10
									100.9	32.9104	4.86532	10	15.7182	3.70549	10
									100.967	32.9305	4.86388	10	15.7182	3.70549	10
									101.034	32.9506	4.86246	10	15.7182	3.70549	10
									101.101	32.9707	4.86106	10	15.7182	3.70549	10
									101.167	32.9908	4.85969	10	15.7182	3.70549	10
									101.234	33.0109	4.85833	10	15.7249	3.70453	10
									101.301	33.031	4.85699	10	15.7316	3.70359	10
									101.368	33.0511	4.85568	10	15.7383	3.70266	10
									101.434	33.0712	4.85439	10	15.745	3.70173	10
									101.501	33.098	4.8508	10	15.7517	3.70082	10
									101.568	33.1248	4.84723	10	15.7584	3.69992	10
									101.634	33.1516	4.84369	10	15.7651	3.69904	10
									101.701	33.1784	4.84016	10	15.7718	3.69816	10
									101.768	33.2052	4.83666	10	15.7785	3.6973	10
									101.835	33.232	4.83318	10	15.7919	3.69489	10
									101.901	33.2588	4.82973	10	15.8053	3.69251	10
									101.968	33.2856	4.82629	10	15.8187	3.69015	10
									102.035	33.299	4.82721	10	15.8321	3.6878	10
									102.102	33.3124	4.82815	10	15.8455	3.68548	10
									102.168	33.3258	4.82911	10	15.8589	3.68317	10
									102.235	33.3392	4.83008	10	15.8723	3.68089	10
									102.302	33.3526	4.83106	10	15.8857	3.67862	10
									102.369	33.366	4.83207	10	15.8991	3.67638	10
									102.435	33.3794	4.83309	10	15.9192	3.67342	10
									102.502	33.3928	4.83412	10	15.9393	3.67049	10
									102.569	33.4062	4.83518	10	15.9594	3.66759	10
									102.635	33.4196	4.83624	10	15.9795	3.66471	10
									102.702	33.433	4.83733	10	15.9996	3.66186	10
									102.769	33.4464	4.83843	10	16.0197	3.65903	10
									102.836	33.4531	4.84005	10	16.0398	3.65624	10
									102.902	33.4598	4.84168	10	16.0599	3.65346	10
									102.969	33.4665	4.84332	10	16.08	3.65072	10
									103.036	33.4732	4.84497	10	16.1001	3.648	10
									103.103	33.4799	4.84662	10	16.1202	3.64531	10
									103.169	33.4866	4.84829	10	16.1403	3.64264	10
									103.236	33.4933	4.84996	10	16.1604	3.64	10
									103.303	33.5067	4.84834	10	16.1805	3.63739	10
									103.37	33.5201	4.84675	10	16.2006	3.63481	10
									103.436	33.5335	4.84516	10	16.2207	3.63225	10
									103.503	33.5469	4.84359	10	16.2408	3.62972	10
									103.57	33.5603	4.84204	10	16.2609	3.62721	10
									103.636	33.5737	4.84051	10	16.281	3.62473	10
									103.703	33.5871	4.83899	10	16.3011	3.62229	10
									103.77	33.6005	4.83749	10	16.3212	3.61986	10
									103.837	33.6139	4.836	10	16.3413	3.61747	10
									103.903	33.6273	4.83453	10	16.3614	3.6151	10
									103.97	33.6407	4.83307	10	16.3815	3.61276	10
									104.037	33.6541	4.83164	10	16.4016	3.61045	10
									104.104	33.6675	4.83021	10	16.4217	3.60816	10
									104.17	33.6809	4.82881	10	16.4418	3.60591	10
									104.237	33.6943	4.82742	10	16.4619	3.60368	10
									104.304	33.7077	4.82604	10	16.482	3.60147	10
									104.371	33.7211	4.82468	10	16.5021	3.5993	10
									104.437	33.7345	4.82334	10	16.5222	3.59715	10
									104.504	33.7479	4.82202	10	16.5423	3.59504	10
									104.571	33.7613	4.82071	10	16.5624	3.59294	10
									104.637	33.7747	4.81941	10	16.5825	3.59088	10
									104.704	33.7881	4.81813	10	16.5959	3.58927	10
									104.771	33.8015	4.81687	10	16.6093	3.58767	10
									104.838	33.8149	4.81563	10	16.6227	3.5861	10
									104.904	33.8283	4.8144	10	16.6361	3.58455	10
									104.971	33.8417	4.81319	10	16.6495	3.58303	10
									105.038	33.8551	4.81199	10	16.6629	3.58152	10
									105.105	33.8685	4.81081	10	16.6763	3.58003	10
									105.171	33.8819	4.80965	10	16.6897	3.57857	10
									105.238	33.8953	4.8085	10	16.7031	3.57713	10
									105.305	33.9087	4.80737	10	16.7165	3.57571	10
									105.372	33.9154	4.80933	10	16.7299	3.57431	10
									105.438	33.9221	4.81129	10	16.7433	3.57294	10
									105.505	33.9288	4.81326	10	16.7567	3.57158	10
									105.572	33.9355	4.81524	10	16.7701	3.57025	10
									105.638	33.9422	4.81722	10	16.7835	3.56894	10
									105.705	33.9489	4.81922	10	16.7969	3.56765	10
									105.772	33.9556	4.82123	10	16.8103	3.56638	10
									105.839	33.9623	4.82324	10	16.8237	3.56514	10
									105.905	33.969	4.82526	10	16.8371	3.56391	10
									105.972	33.9757	4.82729	10	16.8505	3.56271	10
									106.039	33.9757	4.82729	10	16.8639	3.56153	10
									106.106	33.9757	4.82729	10	16.8773	3.56038	10
									106.172	33.9757	4.82729	10	16.8907	3.55924	10
									106.239	33.9757	4.82729	10	16.9041	3.55813	10
									106.306	33.9757	4.82729	10	16.9175	3.55704	10
									106.373	33.9824	4.82656	10	16.9242	3.55687	10
									106.439	33.9891	4.82584	10	16.9309	3.55671	10
									106.506	33.9958	4.82513	10	16.9376	3.55657	10
									106.573	34.0025	4.82443	10	16.9443	3.55644	10
									106.639	34.0092	4.82373	10	16.951	3.55632	10
									106.706	34.0159	4.82305	10	16.9577	3.55621	10
									106.773	34.0226	4.82237	10	16.9644	3.55612	10
									106.84	34.0293	4.82171	10	16.9711	3.55604	10
									106.906	34.036	4.82105	10	16.9778	3.55597	10
									106.973	34.0427	4.82041	10	16.9845	3.55592	10
									107.04	34.0494	4.81977	10	16.9912	3.55587	10
									107.107	34.0561	4.81914	10	16.9979	3.55584	10
									107.173	34.0628	4.81852	10	17.0046	3.55583	10
									107.24	34.0695	4.81791	10	17.0113	3.55582	10
									107.307	34.0762	4.81731	10	17.018	3.55583	10
									107.374	34.0829	4.81672	10	17.0247	3.55585	10
									107.44	34.0896	4.81613	10	17.0314	3.55588	10
									107.507	34.0963	4.81556	10	17.0381	3.55593	10
									107.574	34.103	4.815	10	17.0448	3.55599	10
									107.64	34.1097	4.81444	10	17.0515	3.55606	10
									107.707	34.1164	4.8139	10	17.0582	3.55614	10
									107.774	34.1231	4.81336	10	17.0649	3.55624	10
									107.841	34.1298	4.81283	10	17.0716	3.55634	10
									107.907	34.1365	4.81231	10	17.0783	3.55647	10
									107.974	34.1432	4.81181	10	17.085	3.5566	10
									108.041	34.1499	4.81131	10	17.0917	3.55675	10
									108.108	34.1566	4.81082	10	17.0984	3.55691	10
									108.174	34.1633	4.81034	10	17.1051	3.55708	10
									108.241	34.17	4.80987	10	17.1051	3.55708	10
									108.308	34.1767	4.8094	10	17.1051	3.55708	10
									108.375	34.1834	4.80895	10	17.1051	3.55708	10
									108.441	34.1901	4.80851	10	17.1051	3.55708	10
									108.508	34.1968	4.80807	10	17.1051	3.55708	10
									108.575	34.2035	4.80765	10	17.1051	3.55708	10
									108.641	34.2102	4.80723	10	17.1051	3.55708	10
									108.708	34.2169	4.80683	10	17.1051	3.55708	10
									108.775	34.2236	4.80643	10	17.1051	3.55708	10
									108.842	34.2303	4.80604	10	17.1051	3.55708	10
									108.908	34.237	4.80566	10	17.1051	3.55708	10
									108.975	34.2437	4.8053	10	17.1051	3.55708	10
									109.042	34.2504	4.80494	10	17.1051	3.55708	10
									109.109	34.2571	4.80459	10	17.1051	3.55708	10
									109.175	34.2638	4.80424	10	17.1051	3.55708	10
									109.242	34.2705	4.80391	10	17.1051	3.55708	10
									109.309	34.2772	4.80359	10	17.1051	3.55708	10
									109.376	34.2839	4.80328	10	17.1051	3.55708	10
									109.442	34.2906	4.80297	10	17.1051	3.55708	10
									109.509	34.2973	4.80268	10	17.1051	3.55708	10
									109.576	34.304	4.80239	10	17.1051	3.55708	10
									109.642	34.3107	4.80212	10	17.1051	3.55708	10
									109.709	34.3174	4.80185	10	17.1051	3.55708	10
									109.776	34.3241	4.80159	10	17.1051	3.55708	10
									109.843	34.3308	4.80135	10	17.1051	3.55708	10
									109.909	34.3375	4.80111	10	17.1051	3.55708	10
									109.976	34.3442	4.80088	10	17.1118	3.5545	10
									110.043	34.3509	4.80066	10	17.1185	3.55193	10
									110.11	34.3576	4.80045	10	17.1252	3.54937	10
									110.176	34.3643	4.80025	10	17.1319	3.54683	10
									110.243	34.371	4.80006	10	17.1453	3.54393	10
									110.31	34.3777	4.79987	10	17.1587	3.54106	10
									110.377	34.3844	4.7997	10	17.1721	3.53821	10
									110.443	34.3911	4.79954	10	17.1855	3.53538	10
									110.51	34.3978	4.79938	10	17.1989	3.53257	10
									110.577	34.4045	4.79924	10	17.2123	3.52977	10
									110.643	34.4112	4.7991	10	17.2257	3.527	10
									110.71	34.4179	4.79898	10	17.2391	3.52425	10
									110.777	34.4246	4.79886	10	17.2525	3.52153	10
									110.844	34.4313	4.79875	10	17.2659	3.51882	10
									110.91	34.438	4.79865	10	17.2793	3.51613	10
									110.977	34.4447	4.79856	10	17.2927	3.51346	10
									111.044	34.4514	4.79849	10	17.3061	3.51081	10
									111.111	34.4581	4.79842	10	17.3195	3.50819	10
									111.177	34.4648	4.79835	10	17.3329	3.50558	10
									111.244	34.4715	4.7983	10	17.3463	3.50299	10
									111.311	34.4782	4.79826	10	17.3597	3.50043	10
									111.378	34.4849	4.79823	10	17.3731	3.49789	10
									111.444	34.4916	4.7982	10	17.3865	3.49537	10
									111.511	34.4983	4.79819	10	17.3999	3.49287	10
									111.578	34.505	4.79819	10	17.4133	3.49039	10
									111.644	34.5184	4.79984	10	17.4267	3.48793	10
									111.711	34.5318	4.8015	10	17.4401	3.48549	10
									111.778	34.5452	4.80319	10	17.4468	3.48539	10
									111.845	34.5586	4.80488	10	17.4535	3.48531	10
									111.911	34.572	4.8066	10	17.4602	3.48523	10
									111.978	34.5854	4.80833	10	17.4669	3.48517	10
									112.045	34.5988	4.81008	10	17.4736	3.48513	10
									112.112	34.6122	4.81184	10	17.4803	3.48509	10
									112.178	34.6256	4.81362	10	17.487	3.48507	10
									112.245	34.639	4.81541	10	17.4937	3.48507	10
									112.312	34.6524	4.81722	10	17.5004	3.48507	10
									112.379	34.6658	4.81905	10	17.5071	3.48509	10
									112.445	34.6792	4.82089	10	17.5138	3.48512	10
									112.512	34.6926	4.82275	10	17.5205	3.48516	10
									112.579	34.706	4.82462	10	17.5272	3.48522	10
									112.645	34.7194	4.82651	10	17.5339	3.48529	10
									112.712	34.7328	4.82841	10	17.5406	3.48537	10
									112.779	34.7462	4.83034	10	17.5473	3.48547	10
									112.846	34.7596	4.83227	10	17.554	3.48557	10
									112.912	34.773	4.83422	10	17.5607	3.4857	10
									112.979	34.7864	4.83619	10	17.5674	3.48583	10
									113.046	34.7998	4.83818	10	17.5741	3.48598	10
									113.113	34.8132	4.84018	10	17.5808	3.48613	10
									113.179	34.8266	4.84219	10	17.5875	3.48631	10
									113.246	34.84	4.84422	10	17.5942	3.48649	10
									113.313	34.8534	4.84627	10	17.6009	3.48669	10
									113.38	34.8668	4.84833	10	17.6076	3.4869	10
									113.446	34.8802	4.85041	10	17.6143	3.48783	10
									113.513	34.8936	4.8525	10	17.621	3.48876	10
									113.58	34.907	4.85461	10	17.6277	3.48971	10
									113.646	34.9204	4.85673	10	17.6344	3.49068	10
									113.713	34.9338	4.85888	10	17.6411	3.49165	10
									113.78	34.9472	4.86103	10	17.6478	3.49264	10
									113.847	34.9606	4.8632	10	17.6545	3.49364	10
									113.913	34.974	4.86539	10	17.6612	3.49465	10
									113.98	34.9874	4.86759	10	17.6679	3.49568	10
									114.047	35.0008	4.86981	10	17.6746	3.49672	10
									114.114	35.0142	4.87204	10	17.6813	3.49777	10
									114.18	35.0276	4.87429	10	17.688	3.49883	10
									114.247	35.041	4.87655	10	17.6947	3.4999	10
									114.314	35.0544	4.87883	10	17.7014	3.50099	10
									114.381	35.0678	4.88112	10	17.7081	3.50209	10
									114.447	35.0812	4.88343	10	17.7148	3.5032	10
									114.514	35.0946	4.88575	10	17.7215	3.50433	10
									114.581	35.108	4.88809	10	17.7282	3.50547	10
									114.647	35.1214	4.89045	10	17.7349	3.50662	10
									114.714	35.1348	4.89282	10	17.7416	3.50778	10
									114.781	35.1482	4.8952	10	17.7483	3.50896	10
									114.848	35.1616	4.8976	10	17.755	3.51014	10
									114.914	35.175	4.90002	10	17.7617	3.51134	10
									114.981	35.1884	4.90245	10	17.7684	3.51256	10
									115.048	35.2018	4.90489	10	17.7751	3.51378	10
									115.115	35.2152	4.90735	10	17.7818	3.51502	10
									115.181	35.2286	4.90983	10	17.7885	3.51627	10
									115.248	35.2353	4.91027	10	17.7952	3.51753	10
									115.315	35.242	4.91072	10	17.8019	3.5188	10
									115.382	35.2487	4.91118	10	17.8086	3.52009	10
									115.448	35.2554	4.91166	10	17.8153	3.52139	10
									115.515	35.2621	4.91214	10	17.822	3.5227	10
									115.582	35.2688	4.91263	10	17.8287	3.52402	10
									115.648	35.2755	4.91312	10	17.8354	3.52535	10
									115.715	35.2822	4.91363	10	17.8421	3.5267	10
									115.782	35.2889	4.91415	10	17.8488	3.52806	10
									115.849	35.2956	4.91467	10	17.8555	3.52943	10
									115.915	35.3023	4.91521	10	17.8622	3.53082	10
									115.982	35.309	4.91575	10	17.8689	3.53221	10
									116.049	35.3157	4.9163	10	17.8756	3.53362	10
									116.116	35.3224	4.91686	10	17.8823	3.53504	10
									116.182	35.3291	4.91743	10	17.889	3.53647	10
									116.249	35.3358	4.91801	10	17.8957	3.53792	10
									116.316	35.3425	4.9186	10	17.9024	3.53938	10
									116.383	35.3492	4.9192	10	17.9091	3.54085	10
									116.449	35.3559	4.91981	10	17.9158	3.54233	10
									116.516	35.3626	4.92042	10	17.9225	3.54382	10
									116.583	35.3693	4.92105	10	17.9292	3.54532	10
									116.649	35.376	4.92168	10	17.9359	3.54684	10
									116.716	35.3827	4.92232	10	17.9426	3.54837	10
									116.783	35.3894	4.92298	10	17.9493	3.54991	10
									116.85	35.3961	4.92364	10	17.956	3.55146	10
									116.916	35.4028	4.92431	10	17.9627	3.55303	10
									116.983	35.4095	4.92499	10	17.9694	3.55461	10
									117.05	35.4162	4.92567	10	17.9761	3.55619	10
									117.117	35.4229	4.92637	10	17.9828	3.5578	10
									117.183	35.4296	4.92708	10	17.9895	3.55941	10
									117.25	35.4363	4.92779	10	17.9962	3.56103	10
									117.317	35.443	4.92852	10	18.0029	3.56267	10
									117.384	35.4497	4.92925	10	18.0096	3.56432	10
									117.45	35.4564	4.92999	10	18.0163	3.56598	10
									117.517	35.4631	4.93074	10	18.023	3.56765	10
									117.584	35.4698	4.9315	10	18.0297	3.56933	10
									117.65	35.4765	4.93227	10	18.0364	3.57103	10
									117.717	35.4832	4.93305	10	18.0431	3.57273	10
									117.784	35.4899	4.93384	10	18.0498	3.57445	10
									117.851	35.4966	4.93463	10	18.0565	3.57618	10
									117.917	35.51	4.93743	10	18.0632	3.57793	10
									117.984	35.5234	4.94025	10	18.0699	3.57968	10
									118.051	35.5368	4.94308	10	18.0766	3.58144	10
									118.118	35.5502	4.94592	10	18.0833	3.58322	10
									118.184	35.5636	4.94878	10	18.09	3.58501	10
									118.251	35.577	4.95166	10	18.0967	3.58681	10
									118.318	35.5904	4.95455	10	18.1034	3.58862	10
									118.385	35.6038	4.95745	10	18.1101	3.59045	10
									118.451	35.6172	4.96037	10	18.1101	3.59045	10
									118.518	35.6306	4.9633	10	18.1101	3.59045	10
									118.585	35.644	4.96624	10	18.1101	3.59045	10
									118.651	35.6507	4.96831	10	18.1101	3.59045	10
									118.718	35.6574	4.9704	10	18.1101	3.59045	10
									118.785	35.6641	4.97249	10	18.1101	3.59045	10
									118.852	35.6708	4.97458	10	18.1101	3.59045	10
									118.918	35.6775	4.97669	10	18.1101	3.59045	10
									118.985	35.6842	4.9788	10	18.1168	3.59042	10
									119.052	35.6909	4.98093	10	18.1235	3.59041	10
									119.119	35.6976	4.98306	10	18.1302	3.59041	10
									119.185	35.7043	4.98519	10	18.1369	3.59042	10
									119.252	35.711	4.98734	10	18.1436	3.59044	10
									119.319	35.7244	4.99121	10	18.1503	3.59048	10
									119.386	35.7378	4.99509	10	18.157	3.59053	10
									119.452	35.7579	4.99984	10	18.1637	3.59059	10
									119.519	35.778	5.00462	10	18.1704	3.59067	10
									119.586	35.7981	5.00941	10	18.1771	3.59075	10
									119.652	35.8182	5.01422	10	18.1838	3.59085	10
									119.719	35.8383	5.01905	10	18.1905	3.59097	10
									119.786	35.8584	5.02389	10	18.1972	3.59109	10
									119.853	35.8718	5.02699	10	18.2039	3.59123	10
									119.919	35.8852	5.0301	10	18.2106	3.59138	10
									119.986	35.8986	5.03323	10	18.2173	3.59154	10
									120.053	35.9187	5.03812	10	18.224	3.59171	10
									120.12	35.9388	5.04303	10	18.2307	3.5919	10
									120.186	35.9589	5.04795	10	18.2374	3.5921	10
									120.253	35.979	5.05288	10	18.2441	3.59231	10
									120.32	35.9991	5.05784	10	18.2508	3.59253	10
									120.387	36.0192	5.06281	10	18.2575	3.59277	10
									120.453	36.0393	5.06779	10	18.2642	3.59302	10
									120.52	36.0594	5.07279	10	18.2709	3.59328	10
									120.587	36.0795	5.07781	10	18.2776	3.59355	10
									120.653	36.0996	5.08284	10	18.2843	3.59384	10
									120.72	36.1197	5.08789	10	18.291	3.59414	10
									120.787	36.1398	5.09295	10	18.2977	3.59445	10
									120.854	36.1599	5.09803	10	18.3044	3.59478	10
									120.92	36.18	5.10313	10	18.3111	3.59511	10
									120.987	36.2001	5.10823	10	18.3178	3.59546	10
									121.054	36.2202	5.11336	10	18.3245	3.59582	10
									121.121	36.2403	5.1185	10	18.3379	3.59542	10
									121.187	36.2671	5.1277	10	18.3513	3.59504	10
									121.254	36.2872	5.13507	10	18.3647	3.59467	10
									121.321	36.3073	5.14245	10	18.3781	3.59434	10
									121.388	36.3274	5.14983	10	18.3915	3.59402	10
									121.454	36.3475	5.15723	10	18.4049	3.59373	10
									121.521	36.3676	5.16464	10	18.4183	3.59345	10
									121.588	36.3877	5.17206	10	18.4317	3.5932	10
									121.654	36.4078	5.17949	10	18.4451	3.59298	10
									121.721	36.4279	5.18692	10	18.4585	3.59277	10
									121.788	36.448	5.19437	10	18.4719	3.59259	10
									121.855	36.4681	5.20183	10	18.4853	3.59242	10
									121.921	36.4882	5.20929	10	18.4987	3.59229	10
									121.988	36.5083	5.21677	10	18.5121	3.59217	10
									122.055	36.5284	5.22425	10	18.5255	3.59208	10
									122.122	36.5485	5.23175	10	18.5389	3.592	10
									122.188	36.5686	5.23925	10	18.5523	3.59195	10
									122.255	36.5954	5.24621	10	18.5657	3.59193	10
									122.322	36.6222	5.25319	10	18.5791	3.59192	10
									122.389	36.649	5.26018	10	18.5925	3.59194	10
									122.455	36.6758	5.26718	10	18.6059	3.59198	10
									122.522	36.7026	5.2742	10	18.6193	3.59204	10
									122.589	36.7294	5.28123	10	18.6327	3.59212	10
									122.655	36.7562	5.28828	10	18.6461	3.59223	10
									122.722	36.783	5.29534	10	18.6595	3.59235	10
									122.789	36.8098	5.30241	10	18.6729	3.5925	10
									122.856	36.8366	5.30949	10	18.6796	3.59317	10
									122.922	36.8634	5.31659	10	18.6863	3.59384	10
									122.989	36.8902	5.3237	10	18.693	3.59453	10
									123.056	36.917	5.33082	10	18.6997	3.59523	10
									123.123	36.9438	5.33796	10	18.7064	3.59594	10
									123.189	36.9706	5.34511	10	18.7131	3.59667	10
									123.256	36.9974	5.35227	10	18.7198	3.5974	10
									123.323	37.0242	5.35944	10	18.7265	3.59815	10
									123.39	37.0443	5.36707	10	18.7399	3.5964	10
									123.456	37.0644	5.37471	10	18.7533	3.59467	10
									123.523	37.0845	5.38235	10	18.7667	3.59297	10
									123.59	37.1046	5.39001	10	18.7801	3.59128	10
									123.656	37.1247	5.39767	10	18.7935	3.58962	10
									123.723	37.1448	5.40534	10	18.8069	3.58797	10
									123.79	37.1649	5.41302	10	18.8203	3.58635	10
									123.857	37.185	5.42071	10	18.8337	3.58475	10
									123.923	37.2051	5.42841	10	18.8471	3.58318	10
									123.99	37.2252	5.43611	10	18.8605	3.58162	10
									124.057	37.2453	5.44383	10	18.8739	3.58008	10
									124.124	37.2654	5.45155	10	18.8873	3.57857	10
									124.19	37.2855	5.45928	10	18.9007	3.57708	10
									124.257	37.3056	5.46701	10	18.9141	3.57561	10
									124.324	37.3257	5.47476	10	18.9275	3.57416	10
									124.391	37.3458	5.48251	10	18.9409	3.57273	10
									124.457	37.3659	5.49028	10	18.9543	3.57133	10
									124.524	37.386	5.49805	10	18.9677	3.56995	10
									124.591	37.4061	5.50583	10	18.9811	3.56859	10
									124.657	37.4262	5.51361	10	18.9945	3.56725	10
									124.724	37.453	5.52093	10	19.0079	3.56593	10
									124.791	37.4798	5.52825	10	19.0213	3.56463	10
									124.858	37.5066	5.53558	10	19.0347	3.56336	10
									124.924	37.5334	5.54293	10	19.0481	3.56211	10
									124.991	37.5602	5.55029	10	19.0615	3.56088	10
									125.058	37.587	5.55766	10	19.0749	3.55967	10
									125.125	37.6138	5.56504	10	19.0883	3.55849	10
									125.191	37.6406	5.57244	10	19.1017	3.55732	10
									125.258	37.6674	5.57985	10	19.1151	3.55618	10
									125.325	37.6942	5.58726	10	19.1285	3.55506	10
									125.392	37.721	5.59469	10	19.1419	3.55396	10
									125.458	37.7478	5.60213	10	19.1553	3.55289	10
									125.525	37.7746	5.60959	10	19.1687	3.55184	10
									125.592	37.8014	5.61705	10	19.1821	3.5508	10
									125.658	37.8282	5.62453	10	19.1955	3.5498	10
									125.725	37.8483	5.63241	10	19.2089	3.54881	10
									125.792	37.8684	5.6403	10	19.2223	3.54785	10
									125.859	37.8885	5.64819	10	19.2357	3.5469	10
									125.925	37.9086	5.65609	10	19.2491	3.54598	10
									125.992	37.9287	5.664	10	19.2625	3.54508	10
									126.059	37.9488	5.67192	10	19.2759	3.54421	10
									126.126	37.9689	5.67985	10	19.2893	3.54336	10
									126.192	37.989	5.68778	10	19.3027	3.54253	10
									126.259	38.0091	5.69572	10	19.3161	3.54172	10
									126.326	38.0292	5.70367	10	19.3295	3.54093	10
									126.393	38.0493	5.71162	10	19.3429	3.54017	10
									126.459	38.0694	5.71958	10	19.3563	3.53943	10
									126.526	38.0895	5.72755	10	19.3697	3.53871	10
									126.593	38.1096	5.73553	10	19.3831	3.53801	10
									126.659	38.1297	5.74351	10	19.3965	3.53734	10
									126.726	38.1498	5.7515	10	19.4099	3.53669	10
									126.793	38.1699	5.7595	10	19.4233	3.53606	10
									126.86	38.19	5.7675	10	19.4367	3.53545	10
									126.926	38.2101	5.77551	10	19.4501	3.53487	10
									126.993	38.2302	5.78353	10	19.4635	3.53431	10
									127.06	38.2503	5.79156	10	19.4769	3.53377	10
									127.127	38.2704	5.79959	10	19.4903	3.53325	10
									127.193	38.2905	5.80763	10	19.5037	3.53276	10
									127.26	38.3106	5.81568	10	19.5171	3.53228	10
									127.327	38.3307	5.82373	10	19.5305	3.53184	10
									127.394	38.3508	5.83179	10	19.5439	3.53141	10
									127.46	38.3709	5.83986	10	19.5573	3.531	10
									127.527	38.391	5.84793	10	19.5707	3.53062	10
									127.594	38.4044	5.85346	10	19.5841	3.53026	10
									127.66	38.4178	5.859	10	19.5975	3.52993	10
									127.727	38.4312	5.86455	10	19.6109	3.52961	10
									127.794	38.4446	5.87011	10	19.6243	3.52932	10
									127.861	38.458	5.87567	10	19.6377	3.52906	10
									127.927	38.4714	5.88124	10	19.6511	3.52881	10
									127.994	38.4915	5.88935	10	19.6645	3.52859	10
									128.061	38.5116	5.89746	10	19.6779	3.52839	10
									128.128	38.5317	5.90558	10	19.6913	3.52821	10
									128.194	38.5518	5.91371	10	19.7047	3.52805	10
									128.261	38.5719	5.92184	10	19.7181	3.52792	10
									128.328	38.592	5.92998	10	19.7315	3.52781	10
									128.395	38.6121	5.93812	10	19.7449	3.52772	10
									128.461	38.6322	5.94627	10	19.7583	3.52766	10
									128.528	38.6523	5.95443	10	19.7717	3.52761	10
									128.595	38.6724	5.9626	10	19.7851	3.52759	10
									128.661	38.6925	5.97077	10	19.7985	3.5276	10
									128.728	38.7126	5.97895	10	19.8119	3.52762	10
									128.795	38.7327	5.98713	10	19.8253	3.52767	10
									128.862	38.7528	5.99532	10	19.8387	3.52774	10
									128.928	38.7729	6.00351	10	19.8521	3.52783	10
									128.995	38.793	6.01172	10	19.8655	3.52795	10
									129.062	38.8131	6.01992	10	19.8789	3.52809	10
									129.129	38.8332	6.02814	10	19.8923	3.52825	10
									129.195	38.8533	6.03636	10	19.9057	3.52843	10
									129.262	38.8734	6.04459	10	19.9191	3.52864	10
									129.329	38.8935	6.05282	10	19.9325	3.52887	10
									129.396	38.9136	6.06106	10	19.9459	3.52912	10
									129.462	38.9337	6.06931	10	19.9593	3.52939	10
									129.529	38.9538	6.07756	10	19.9727	3.52969	10
									129.596	38.9739	6.08582	10	19.9861	3.53001	10
									129.662	38.994	6.09408	10	19.9995	3.53035	10
									129.729	39.0141	6.10235	10	20.0129	3.53072	10
									129.796	39.0342	6.11062	10	20.0263	3.5311	10
									129.863	39.0543	6.1189	10	20.0397	3.53151	10
									129.929	39.0744	6.12719	10	20.0531	3.53194	10
									129.996	39.0945	6.13549	10	20.0665	3.5324	10
									130.063	39.1146	6.14378	10	20.0799	3.53288	10
									130.13	39.1347	6.15209	10	20.0933	3.53338	10
									130.196	39.1548	6.1604	10	20.1067	3.5339	10
									130.263	39.1749	6.16872	10	20.1201	3.53444	10
									130.33	39.195	6.17704	10	20.1335	3.53501	10
									130.397	39.2151	6.18537	10	20.1469	3.5356	10
									130.463	39.2285	6.18959	10	20.1603	3.53621	10
									130.53	39.2419	6.19383	10	20.1737	3.53685	10
									130.597	39.2553	6.19807	10	20.1871	3.5375	10
									130.663	39.262	6.2007	10	20.2005	3.53818	10
									130.73	39.2687	6.20333	10	20.2139	3.53889	10
									130.797	39.2821	6.21007	10	20.2273	3.53961	10
									130.864	39.2955	6.2168	10	20.2474	3.54002	10
									130.93	39.3089	6.22354	10	20.2608	3.53842	10
									130.997	39.3223	6.23029	10	20.2742	3.53684	10
									131.064	39.3357	6.23704	10	20.2943	3.53367	10
									131.131	39.3491	6.2438	10	20.3144	3.53053	10
									131.197	39.3625	6.25057	10	20.3345	3.52741	10
									131.264	39.3759	6.25734	10	20.3546	3.52432	10
									131.331	39.3893	6.26411	10	20.3747	3.52126	10
									131.398	39.4027	6.27089	10	20.3948	3.51822	10
									131.464	39.4161	6.27768	10	20.4149	3.51521	10
									131.531	39.4295	6.28447	10	20.435	3.51223	10
									131.598	39.4429	6.29127	10	20.4551	3.50928	10
									131.664	39.4563	6.29807	10	20.4752	3.50635	10
									131.731	39.4697	6.30487	10	20.4953	3.50345	10
									131.798	39.4831	6.31169	10	20.5154	3.50058	10
									131.865	39.4965	6.3185	10	20.5355	3.49773	10
									131.931	39.5099	6.32533	10	20.5556	3.49492	10
									131.998	39.5233	6.33216	10	20.5757	3.49213	10
									132.065	39.5367	6.33899	10	20.5958	3.48937	10
									132.132	39.5501	6.34583	10	20.6159	3.48663	10
									132.198	39.5635	6.35267	10	20.636	3.48393	10
									132.265	39.5769	6.35952	10	20.6561	3.48125	10
									132.332	39.5903	6.36637	10	20.6762	3.4786	10
									132.399	39.6037	6.37323	10	20.6963	3.47598	10
									132.465	39.6238	6.38119	10	20.7164	3.47339	10
									132.532	39.6439	6.38915	10	20.7365	3.47082	10
									132.599	39.664	6.39711	10	20.7566	3.46828	10
									132.665	39.6841	6.40508	10	20.7767	3.46578	10
									132.732	39.7042	6.41306	10	20.7968	3.4633	10
									132.799	39.7243	6.42105	10	20.8169	3.46085	10
									132.866	39.7444	6.42903	10	20.837	3.45842	10
									132.932	39.7645	6.43703	10	20.8571	3.45603	10
									132.999	39.7779	6.44392	10	20.8772	3.45366	10
									133.066	39.7913	6.4508	10	20.8973	3.45133	10
									133.133	39.8047	6.4577	10	20.9174	3.44902	10
									133.199	39.8181	6.4646	10	20.9375	3.44674	10
									133.266	39.8315	6.4715	10	20.9576	3.44449	10
									133.333	39.8449	6.47841	10	20.9777	3.44227	10
									133.4	39.8583	6.48532	10	20.9911	3.44003	10
									133.466	39.8717	6.49224	10	21.0112	3.44202	10
									133.533	39.8851	6.49916	10	21.0313	3.44403	10
									133.6	39.8985	6.50609	10	21.0514	3.44608	10
									133.666	39.9119	6.51302	10	21.0715	3.44816	10
									133.733	39.9253	6.51996	10	21.0916	3.45026	10
									133.8	39.9387	6.5269	10	21.1117	3.4524	10
									133.867	39.9521	6.53385	10	21.1318	3.45456	10
									133.933	39.9655	6.5408	10	21.1519	3.45675	10
									134	39.9789	6.54776	10	21.172	3.45897	10
									134.067	39.9923	6.55472	10	21.1921	3.46122	10
									134.134	40.0057	6.56169	10	21.2122	3.4635	10
									134.2	40.0191	6.56866	10	21.2323	3.46581	10
									134.267	40.0325	6.57564	10	21.2524	3.46814	10
									134.334	40.0459	6.58261	10	21.2725	3.47051	10
									134.401	40.0593	6.5896	10	21.2926	3.4729	10
									134.467	40.0727	6.59659	10	21.3127	3.47532	10
									134.534	40.0861	6.60359	10	21.3328	3.47777	10
									134.601	40.0995	6.61059	10	21.3462	3.47592	10
									134.668	40.1129	6.61759	10	21.3663	3.47842	10
									134.734	40.1263	6.6246	10	21.3864	3.48095	10
									134.801	40.1397	6.63161	10	21.4065	3.4835	10
									134.868	40.1531	6.63863	10	21.4266	3.48609	10
									134.934	40.1665	6.64565	10	21.44	3.48434	10
									135.001	40.1799	6.65268	10	21.4534	3.48262	10
									135.068	40.1933	6.65971	10	21.4668	3.48092	10
									135.135	40.2067	6.66675	10	21.4802	3.47925	10
									135.201	40.2201	6.67379	10	21.4936	3.47759	10
									135.268	40.2335	6.68084	10	21.507	3.47596	10
[truncated: 2,500 more rows]
